1  
2  
3  
4  
5  
6  
7  
8  
9  
10  
11  
12  
13  
14  
15  
16  
17  
18  
19  
20  
21  
22

**MULTIPLE CAPSID PROTEIN BINDING SITES MEDIATE  
SELECTIVE PACKAGING OF THE ALPHAVIRUS GENOMIC RNA**

Rebecca S. Brown<sup>1</sup>, Dimitrios G. Anastasakis<sup>2</sup>, Markus Hafner<sup>2</sup> and Margaret Kielian<sup>1\*</sup>

<sup>1</sup>Department of Cell Biology, Albert Einstein College of Medicine, Bronx, NY, 10461,  
USA

<sup>2</sup>Laboratory of Muscle Stem Cells and Gene Regulation, National Institute of Arthritis  
and Musculoskeletal and Skin Disease, Bethesda, MD, 20892, USA

\*Correspondence: [margaret.kielian@einsteinmed.org](mailto:margaret.kielian@einsteinmed.org)

23 **ABSTRACT**

24           The alphavirus capsid protein (Cp) selectively packages genomic RNA (gRNA)  
25 into the viral nucleocapsid to produce infectious virus. Using photoactivatable  
26 ribonucleoside crosslinking and an innovative biotinylated Cp retrieval method, we  
27 comprehensively defined binding sites for Semliki Forest virus (SFV) Cp on the gRNA.  
28 While data in infected cells demonstrated Cp binding to the proposed genome  
29 packaging signal (PS), mutagenesis experiments showed that PS was not required for  
30 production of infectious SFV or Chikungunya virus. Instead, we identified multiple novel  
31 Cp binding sites that were enriched on gRNA-specific regions and promoted infectious  
32 SFV production and gRNA packaging. Comparisons of binding sites in cytoplasmic vs.  
33 viral nucleocapsids demonstrated that budding caused discrete changes in Cp-gRNA  
34 interactions. Notably, Cp's top binding site was maintained throughout virus assembly,  
35 and specifically bound and assembled with Cp into core-like particles *in vitro*. Together  
36 our data suggest a new model for selective alphavirus genome recognition and  
37 assembly.

38

39

40

41

## 42 INTRODUCTION

43           Alphaviruses are enveloped, highly organized RNA viruses that include a number  
44 of important human pathogens such as Chikungunya virus (CHIKV), Ross River virus  
45 (RRV), and Venezuelan Equine Encephalitis virus (VEEV) <sup>1</sup>. These viruses are  
46 transmitted by mosquito vectors and can infect a wide variety of mammalian and avian  
47 species. Alphaviruses are organized into complexes based on genetic and antigenic  
48 relationships <sup>2</sup>. While the general features of structure and lifecycle are shared,  
49 alphaviruses can differ in properties such as receptor usage, tissue tropism and  
50 pathogenesis. Within the Semliki Forest virus (SFV) complex, CHIKV and RRV cause  
51 severe polyarthritis and have emerged to produce epidemics that affect millions of  
52 people globally <sup>3-5</sup>. To date, there are no specific antiviral treatments or licensed  
53 vaccines for any alphavirus.

54           Alphaviruses infect host cells by endocytic uptake and membrane fusion, thereby  
55 delivering the nucleocapsid (NC) core into the cytoplasm where replication takes place  
56 <sup>1</sup>. NC disassembly is thought to be mediated by interactions with ribosomes, resulting in  
57 the uncoating of the RNA genome <sup>6</sup>. The viral genome (gRNA) is an ~11.5 kb single-  
58 stranded plus-sense RNA that is 5'-capped and contains a 3'-polyA tail. It is translated  
59 to produce the viral nonstructural proteins (nsP1-4), which assemble a membrane-  
60 associated replication complex (reviewed in <sup>1,7</sup>). An antisense complement of the gRNA  
61 is synthesized and this negative-sense RNA serves as the template for producing new  
62 gRNAs. In addition, an internal promoter drives the production of a smaller RNA that is  
63 identical in sequence to the last ~1/3 of the gRNA. This subgenomic RNA (sgRNA) is  
64 translated to produce the viral structural proteins: capsid protein (Cp), 6K/TF, and the

65 E1 and E2 envelope proteins. Cp specifically interacts with the gRNA to assemble the  
66 NC (Fig. 5a). Budding of progeny virus at the plasma membrane releases particles with  
67 icosahedral symmetry, containing 240 copies each of Cp, E1, and E2, and 1 gRNA<sup>1,8</sup>.

68       Alphaviruses have a robust growth cycle and produce particles with high specific  
69 infectivity, indicating strong quality control of particle assembly and genome packaging.  
70 However, it is not clear how the specific recognition and assembly of the viral RNA into  
71 NC occurs, given that Cp must select gRNA in the presence of a 3-4-fold molar excess  
72 of sgRNA produced from the replication complexes<sup>9-12</sup>. In addition, while virus infection  
73 inhibits transcription of most cellular RNAs<sup>13,14</sup>, abundant host RNAs still remain in the  
74 infected cell. Serial passage under high multiplicity conditions can lead to the production  
75 of defective viral genomes that can be packaged into defective interfering (DI) particles.  
76 Such DI particles are missing portions of the gRNA, and are dependent on wild type  
77 helper virus for their propagation. Mapping, sequence analysis and mutagenesis studies  
78 of DI particles support the presence of a packaging signal (PS) in the gRNA that  
79 promotes its recruitment into virus particles (reviewed in<sup>15</sup>). The nature and location of  
80 the PS appear to vary depending on the virus complex, with the VEEV complex and  
81 Sindbis virus (SINV) complex having a PS located in the nsP1 region<sup>16,17</sup>. In contrast,  
82 the PS for the SFV complex including CHIKV and RRV maps within the nsP2 region  
83<sup>18,19</sup>. The evidence for a role of the PS in genome packaging is strongest for VEEV,  
84 where mutation of the PS in nsP1 leads to an approximately 2-log reduction in virus titer  
85 while still supporting growth to  $\sim 10^8$  PFU/ml<sup>17</sup>.

86       While the inference is that the PS functions by interaction with the Cp, as yet  
87 there is no evidence for Cp's direct binding to the PS in infected cells. Such studies are

88 complicated by the fact that the highly basic nature of the Cp promotes its non-specific  
89 interaction with nucleic acids and proteins *in vitro* or in cell lysates<sup>6,20-24</sup>. Here we  
90 developed a novel biotinylation system to stringently and efficiently retrieve the capsid  
91 protein from SFV-infected cells or virus particles. We combined this with PAR-CLIP  
92 (photoactivatable ribonucleoside crosslinking and immunoprecipitation)<sup>25</sup> to  
93 comprehensively map Cp interactions on the SFV genome with nucleotide precision.  
94 Our results identify novel Cp binding sites on the gRNA, rule out a role for the SFV and  
95 CHIKV PS, highlight changes in Cp-gRNA interactions during virus biogenesis, and  
96 identify a site on the gRNA that Cp preferentially binds and assembles with *in vitro*.  
97 Together our data support a new model for alphavirus gRNA packaging and assembly  
98 that is mediated by Cp binding to multiple sites on the gRNA.

99

## 100 **RESULTS**

101 **AVI-tagged Cp is a new tool to stringently and efficiently retrieve Cp.** The  
102 alphavirus Cp is composed of an N-terminal polybasic RNA-binding domain that  
103 mediates gRNA packaging, and a C-terminal protease domain that forms the outer NC  
104 shell (reviewed in<sup>15</sup>). The charged nature of the Cp (pI ~ 10) promotes non-specific,  
105 electrostatically-driven interactions, but wash conditions sufficient to disrupt them lead  
106 to poor protein retrieval by a variety of polyclonal and monoclonal Cp antibodies (RSB,  
107 unpublished observations). Moreover, prior studies showed that tagging Cp with  
108 proteins such as mCherry caused aberrant Cp localization and NC morphology (e.g.,  
109<sup>26</sup>). In order to map Cp's binding sites on the gRNA, we devised a novel Cp retrieval  
110 strategy that takes advantage of the high affinity interaction of biotin with Streptavidin.

111 The 13 residue minimal biotin acceptor peptide (mAVI tag; Fig. 1a) is specifically and  
112 efficiently biotinylated by the biotin ligase BirA<sup>27-30</sup>. We engineered the mAVI tag into  
113 the SFV infectious clone after Cp residue 95 (SFV-mAVI; Fig. 1a), a site previously  
114 shown to be permissive for small peptide insertions<sup>26,31</sup>. As a host cell for our studies  
115 we constructed a Vero cell line stably expressing humanized BirA in the cytoplasm  
116 (Vero BirA cells). Virus growth experiments showed that the mAVI tag was well  
117 tolerated, causing a modest decrease in maximal titers (Fig. S1a). We observed no  
118 difference in virus or NC morphology by transmission electron microscopy (Fig. S1b), or  
119 in the expression or localization of biotinylated Cp-mAVI vs. Cp-WT in infected cells  
120 (Figs. 1b, S1c-e.) No change was detected in SFV-mAVI vs. WT specific infectivity as  
121 calculated by comparing the number of infectious particles to total particles (PFU:E2  
122 ratio) (Fig. 1c), thus indicating accurate packaging of the gRNA by Cp-mAVI. Using the  
123 biotin handle on Cp, we optimized retrieval conditions with Streptavidin beads to  
124 efficiently and specifically pull-down Cp. Under these stringent conditions (including  
125 0.5% SDS and washing with 0.5 M NaCl), Cp was retrieved from infected BirA cells only  
126 when biotin was present in the culture medium (Fig. 1d).

127 **Cp binds many discrete sites across the genome.** To define the Cp binding  
128 sites on the gRNA in infected cells at nucleotide resolution, we combined our optimized  
129 Cp retrieval system with the sensitive and specific PAR-CLIP method<sup>25</sup>. PAR-CLIP  
130 uses a photoactivatable ribonucleoside to crosslink labeled RNAs to their binding  
131 proteins, with up to 1000-fold higher crosslinking efficiency compared to traditional  
132 CLIP-seq approaches. Crosslinking induces T-to-C mutations during cDNA library  
133 generation, enabling precise identification of a protein's specific binding sites on the

134 RNA<sup>25</sup>. Vero BirA cells were infected with SFV-mAVI for 1.5 h. The cells were then  
135 cultured in the presence of excess biotin to ensure robust Cp-mAVI biotinylation and the  
136 photoactivatable ribonucleoside 4-thiouridine (4SU) to label nascent RNAs. 4SU had no  
137 effect on virus growth (data not shown). Because alphaviruses inhibit Pol II transcription  
138 early in infection<sup>13,14</sup>, this 4SU labeling strategy strongly biases labeling towards viral  
139 RNAs over cellular RNAs. At 7 hours post-infection cells were irradiated with UV ( $\lambda$   
140  $>310$  nm) to crosslink RNAs with bound proteins, lysed, and RNAs digested with RNase  
141 T1 to produce footprints protected by RNA binding proteins. The total cellular pool of  
142 Cp-mAVI-biotin was then retrieved with Streptavidin beads, and crosslinked RNAs were  
143 5'-end labeled with  $\gamma$ -<sup>32</sup>P-ATP and subjected to SDS-PAGE followed by transfer to a  
144 nitrocellulose membrane. The resulting Cp-RNA adducts were only detected upon UV  
145 irradiation and were the only UV-dependent crosslinked products that were retrieved  
146 (Figs. 1e and S1f).

147 The RNAs crosslinked to Cp were purified and converted into cDNA libraries and  
148 sequenced using the Illumina MiSeq Platform (see Methods for details). From two  
149 biological replicates we obtained 1,384,633 and 3,213,621 sequence reads of which  
150 121,119 and 284,837 mapped to the viral genome, respectively. For further analysis we  
151 only considered the 105,920 and 233,188 sequence reads, respectively, that contained  
152 the diagnostic T-to-C mutation introduced during cDNA library construction of 4SU-  
153 labeled and crosslinked RNA. This allowed us to a) remove background sequences  
154 from co-purifying, non-crosslinked fragments from abundant RNAs and b) identify the  
155 crosslinking site at nucleotide resolution. Comparison of the crosslinked sequence  
156 reads revealed an excellent correlation for read density of the gRNA between the two

157 biological replicates (Pearson correlation coefficient  $r=0.8123$ ). We proceeded to  
158 combine the two datasets and count normalized read density across every nucleotide in  
159 the gRNA (Fig. 2a). Cp binding sites were defined using an arbitrary cutoff of read  
160 density (Experimental Methods). Altogether we defined 58 high-confidence sites with a  
161 median length of 24 nt (Table S1). Approximately ~100 additional Cp interaction sites  
162 could be observed on the gRNA, but with significantly lower read densities (Table S2).

163 Analysis of the nucleotide composition of Cp's top 58 binding sites revealed that  
164 these sequences were relatively U-rich and A-poor (Fig. S2a). In contrast, sequences  
165 negative for Cp binding in either replicate were relatively A-rich (Fig. S2a). Previous  
166 studies show that PAR-CLIP can identify binding sites of all compositions. For example,  
167 binding sites for the HIV-Gag protein are not U-rich<sup>32</sup>, while CNBP and DHX36  
168 selectively bind G-rich sites<sup>33,34</sup>. Thus our results suggest that the SFV Cp does in fact  
169 preferentially bind U-rich sequences in the cell. A computational search<sup>35</sup> for sequence  
170 motifs enriched in the top 58 Cp binding sites revealed that GC- and UG-based motifs  
171 were common, but did not identify a specific sequence motif from these 58 sites (Fig.  
172 S3a).

173 The published DI-RNA studies mapped the SFV PS to a 266 nt region located  
174 within the nsP2 gene (nt:2726-2991; here termed Full PS), suggesting a role for this  
175 region in gRNA packaging<sup>18,19</sup>. Our PAR-CLIP data showed that Cp bound a 35 nt  
176 region towards the 3' end of this region (nt:2892-2926; here termed Cp-PS binding site),  
177 with weaker Cp binding also observed within nt:2815-2856 (Fig. 2c). This is the first  
178 direct demonstration of in cell interaction of Cp within the Full PS region. However, the



179 Cp-PS binding site was not the top binding site on the gRNA, with 20 other sites  
180 showing higher binding (Fig. 2a and 2b).

181 We re-analyzed the Cp binding sites on the gRNA using the Cp-PS binding site  
182 as a lower cutoff. Within these 21 high affinity sites there was a stronger trend towards  
183 Cp binding U-rich and A-poor sequences (Fig. S2a). Sequence motif analysis of the top  
184 21 sites showed an enrichment for UUG and UGG-trinucleotide motifs (Fig. S3a).  
185 Secondary structure predictions for the top 21 sites predicted all 21 RNAs would adopt  
186 stem-loop structures, but of varying sizes (Fig. S3b)<sup>36</sup>.

187 Manual inspection of Cp's highest affinity sites revealed that Cp's top two binding  
188 sites (nt:5988-6016 and nt:4563-4592) (Fig. 2b, sites #1 and #2) are very similar in  
189 sequence and contain UUG and UGG motifs (Fig. 2d, bolded). Furthermore, sites #1  
190 and #2 share an identical stretch of 7-nucleotides not present at any other location  
191 within the gRNA (Fig. 2b and d, underlined). Sequence alignment analysis showed that  
192 site #1's sequence is hyperconserved across several other viruses in the SFV complex  
193 compared to their overall sequence identity (Fig. 2e), while site #2 and twelve other top  
194 binding sites are hyperconserved in CHIKV as well (Fig. S4a). Closer inspection of site  
195 #1 and #2's predicted secondary structures revealed similar stem-loop structures  
196 containing tandem G:U wobble base pairs within the stem (Fig. S3b). Tandem G:U  
197 wobble base pairs were also predicted to form in the stems of sites #8, #14, and #15  
198 (Fig. S3b).

199 **Cp preferentially binds sequences unique to the genomic RNA.** The sgRNA  
200 is identical in sequence to the last ~1/3<sup>rd</sup> of the gRNA and is present in 3-4X molar  
201 excess over it in infected cells<sup>9-11</sup>. It has therefore been hypothesized that Cp binding

202 sites specific to the gRNA, such as the PS, dictate selective packaging in infected cells.  
203 Inspection of our PAR-CLIP data suggested that Cp binding was biased towards the  
204 first  $\sim 2/3^{\text{rd}}$  of the genome (Fig. 2a). To formally test this, we summed the number of  
205 observed reads at each nucleotide position and categorized them as mapping to the  
206 gRNA-specific region vs. mapping to the sgRNA-overlapping region (Fig. 3a). We  
207 performed a chi-square analysis to test whether the observed summed read  
208 distributions were statistically different from our null hypothesis, in which random Cp  
209 binding would result in  $\sim 2/3$  of the summed reads mapping within the gRNA-specific  
210 region and  $\sim 1/3$  within the sgRNA region. The results showed that for each replicate,  
211 observed read distributions mapping to gRNA-specific regions were significantly higher  
212 than expected ( $p < 0.0001$ ) (Fig. 3a). This result was not due to a nucleotide bias as the  
213 gRNA-specific and sgRNA sequences have nearly identical compositions (Fig. 3b). The  
214 enriched binding of Cp to gRNA-unique sequences suggests a direct molecular  
215 rationale for selective Cp recognition and packaging of gRNA vs. sgRNA.

216 **Mutation of multiple Cp binding sites inhibits infectious virus production**  
217 **and rules out a role for the PS.** We set out to assess the significance of Cp's top  
218 binding sites on genome packaging by mutating them and measuring the effect on  
219 infectious virus production. All mutations were designed to strictly maintain amino acid  
220 sequence identity, disrupt predicted secondary structures, and minimize rare codon  
221 usage and changes in dinucleotide frequencies (Table S3). We first mutated the Full PS  
222 previously identified by DI RNA studies (see Fig. S3c for predicted effects on PS  
223 secondary structure). To our knowledge, while such mutational analyses have been  
224 performed for the SINV and VEEV PS <sup>17</sup>, this is the first direct test of PS function for any

225 SFV complex virus. We infected Vero cells with the SFV WT or Full PS mutant and  
226 measured infectious virus production over time. The Full PS mutant did not affect virus  
227 growth compared to WT (Fig. 4a). This is consistent with our PAR-CLIP data, which  
228 demonstrated that Cp does not extensively interact with the PS region, and more  
229 efficiently binds ~20 other sites on the gRNA.

230 To test if other alphaviruses in the SFV complex were dependent on the  
231 previously identified PS, we mutated the region of the CHIKV gRNA corresponding to  
232 the SFV DI-RNA-derived Full PS (Fig. S4b and Table S3). Similar to our results with  
233 SFV, we observed no effect of mutation of the CHIKV Full PS on infectious CHIKV  
234 production (Fig. 4b).

235 We next focused on a series of mutational analyses of the top gRNA-specific  
236 binding sites. Mutation of Cp binding sites #1 and #2 (Double mutant) had no significant  
237 effect on infectious virus production (Fig. 4c). Mutagenesis of sites #1-4 plus the Cp-PS  
238 binding site (Quintuple mutant) caused a small but statistically significant growth defect  
239 at 5 hpi (Fig. 4c); growth at later time points was comparable to that of WT. We then  
240 tested if packaging could occur through cooperation among multiple Cp binding sites on  
241 the gRNA. Such a multi-site packaging mechanism has been described for some plus-  
242 sense RNA viruses<sup>15,37</sup>. Using the 35 nt Cp-PS binding site as a threshold, we mutated  
243 17 gRNA-specific binding sites including Cp-PS, representing Cp's highest affinity  
244 binding sites on the gRNA (Table S3). Other than the site within the PS, none of these  
245 have been previously implicated in any stage of the alphavirus life cycle. The 17-site  
246 mutant produced significantly less infectious virus compared to WT ( $p < 0.05$ ) at early  
247 time points of virus production (Fig. 4c; 5 and 6 hpi). Combining the 17-site mutant with

248 the full PS mutant produced no additional decrease in virus production (data not  
249 shown). The 17-site mutant phenotype became more moderate at late times of virus  
250 production (Fig. 4c; 8 and 10 hpi), suggesting that these sites are most important at  
251 early time points in virus assembly when Cp levels are limiting. This is consistent with a  
252 multi-site packaging mechanism where high affinity binding sites on the gRNA have a  
253 greater impact on gRNA recognition and NC assembly at early infection times when Cp  
254 levels are lower <sup>38</sup>.

255 To determine if the 17-site mutant specifically impacted gRNA packaging and  
256 virus assembly vs. aspects of virus replication, we first checked viral protein expression  
257 levels by western blot. We observed comparable levels of both nsP2 and Cp between  
258 WT vs. 17-site mutant-infected cells (Fig. 4d). We next used RT-qPCR to measure  
259 cellular gRNA and sgRNA levels over the course of virus infection, using primers that  
260 either specifically amplify the gRNA or amplify both gRNA and sgRNA [gRNA+sgRNA]  
261 due to their overlapping sequences. No significant difference was observed in cellular  
262 gRNA or [gRNA+sgRNA] levels between WT and 17-site mutant-infected cells from 3-7  
263 hpi (Fig. 4e). Thus, although the gRNA mutations significantly reduce infectious virus  
264 production, this was not due to defects in viral RNA replication or protein expression.

265 We next asked whether the reduction in infectious particles could be due to a  
266 decrease in genome packaging in the 17-site mutant. We infected cells, purified SFV  
267 WT or 17-site mutant viruses, and quantitated viral gRNA and [gRNA+sgRNA] levels in  
268 the released particles. There was a significant decrease in gRNA in the 17-site mutant  
269 virus collected at 5 hpi (>10-fold reduction;  $p < 0.01$ ) (Fig. 4f). There was no significant  
270 difference in gRNA levels at 7 hpi, or in [gRNA+sgRNA] levels for either time point (Fig.

271 4f). The ~10-fold reduction in gRNA levels in the 17-site mutant virus at 5 hpi correlated  
272 well with the ~10-fold reduction in infectious particles observed in a parallel sample at 5  
273 hpi (Fig. 4g).

274 At these time points and multiplicities we were unable to directly quantitate  
275 particle numbers by quantitating E2 in released viral particles (data not shown). Since it  
276 was previously demonstrated that a decrease in alphavirus gRNA packaging can result  
277 in increased packaging of the sgRNA<sup>11,17</sup>, we analyzed if there was more sgRNA  
278 packaged into 17-site mutant particles. Results showed that even though the gRNA  
279 levels were significantly reduced in the mutant virus particles at 5 hpi, their  
280 [gRNA+sgRNA] levels were not significantly different from those of WT virus (Fig. 4f).  
281 Comparing the ratio of [gRNA+sgRNA] to gRNA between the WT and 17-site mutant  
282 particles showed a significantly higher ratio (~4-fold,  $p < 0.05$ ) for the 17-site mutant  
283 compared to WT (Fig. 4h), suggesting a higher proportion of sgRNA in the mutant  
284 particles. These data thus suggest that the decrease in gRNA and infectious particles  
285 observed for the 17-site mutant is at least in part caused by increased non-specific  
286 packaging of the sgRNA.

287 Together, our results rule out a significant role of the previously proposed DI-  
288 RNA-derived PS in infectious virus production for the SFV complex. Instead, they  
289 support a mechanism in which alphaviruses package their gRNAs through Cp  
290 interaction with multiple high affinity sites present in the gRNA-specific region of the  
291 genome.

292 **Changes in Cp:gRNA interactions during virus exit.** Our PAR-CLIP results  
293 were obtained by analysis of the total cellular Cp in infected cells, a pool that includes

294 both unassembled Cp and assembled NC (Fig. 5a). To examine different stages of virus  
295 assembly, we compared these total cellular Cp results with PAR-CLIP analyses  
296 performed on cellular and viral NC produced in 4SU-labeled cells (Fig. 5a). For cellular  
297 NC, UV-crosslinking was performed on infected cells as above, followed by cell lysis  
298 and subsequent NC purification by sucrose gradient sedimentation (Fig. S2b). For viral  
299 NC, released virus particles were pelleted, UV-crosslinked, and then lysed. Biotinylated  
300 Cp-RNA adducts from viral and cellular NCs were retrieved with Streptavidin beads  
301 (Fig. S2c), as described above. As observed for the total cellular Cp, retrieval was  
302 strictly dependent on UV irradiation (Fig. 5b). PAR-CLIP libraries were generated from  
303 two biological replicates for each sample type, and reads were processed as above.  
304 Biological replicates correlated strongly (Pearson correlation coefficients of  $r=0.8655$  for  
305 cellular NC and  $r=0.9459$  for viral NC) and thus we averaged the duplicate libraries and  
306 plotted normalized read density across the gRNA sequence (Fig. 5c and 5d).

307 Overall, Cp:gRNA interactions appear similar across virus assembly states, with  
308 many of the same binding sites maintained over the course of assembly (Fig. 5c and 5d,  
309 arrowheads). Cp's highest affinity site in the total cellular Cp sample (Fig. 2b, #1) is also  
310 the highest affinity site in cellular NCs (Fig. 5c, termed NC#1) and viral NCs (Fig. 5d,  
311 termed V#1), demonstrating that Cp preferentially binds this specific RNA sequence  
312 across virus assembly states. Additionally, the third best bound site in the total cellular  
313 Cp population (Fig. 2b, #3) was also the third best bound site in cellular NC (Fig. 5c,  
314 NC#3) and the second-best bound site in viral NC (Fig. 5b, V#2). Cp's top four binding  
315 sites in the total cellular Cp population also showed strong binding within cellular NC  
316 and viral NC (Figs. 2b, 5c, 5d and Table S2), further emphasizing Cp's affinity for these

317 RNA sequences. In addition, all of the assembly states displayed enriched binding of Cp  
318 to gRNA-specific sequences (Fig. 5d).

319         Distinct changes were observed between cellular NC and viral NC (Fig. 5c, black  
320 arrows). For example, Cp's second highest affinity site in cellular NC is located at  
321 nt:2997-3016 (Fig. 5c, NC#2). Upon virion budding, this binding site drops below the top  
322 50 binding sites within the viral NC. This pattern of strong Cp:gRNA binding events in  
323 cellular NC that become less prominent in viral NC is also observed for cellular NC sites  
324 NC#4 (nt:6096-6115), NC#5 (nt:4954-4972), and NC#8 (nt:5569-5706), among others  
325 (Fig. 5c, arrows). In contrast, certain sites such as site #1 are bound in all of the  
326 assembly states we assayed, suggesting these sites may play critical roles in NC  
327 assembly and structure.

328         **Specific binding of Cp and gRNA site #1 *in vitro*.** Cp's high promiscuity for  
329 nucleic acids and anionic molecules *in vitro* induces its assembly into core-like particles  
330 (CLPs) that resemble NCs<sup>20,22,23</sup>. CLP assembly is largely driven by electrostatic  
331 interactions with little discrimination among anionic cargoes<sup>24,39</sup>. Because of this, it is  
332 unclear whether specific RNA sequences can drive CLP and NC assembly. To date, no  
333 discrete RNA sequence has been shown to be specifically recognized by full length Cp  
334 both in infected cells and *in vitro*. Our PAR-CLIP data showed that Cp's top binding site  
335 on the gRNA across all stages of virus assembly was the same sequence (#1 in Fig. 2a,  
336 5c, and 5d). This suggested that site #1 may encompass a distinct RNA motif  
337 recognized by Cp. To assess this, we tested whether Cp specifically binds and/or  
338 assembles with site #1 *in vitro*. We recombinantly expressed and purified N-terminally  
339 Strep-tagged SFV Cp (Fig. S5a). To specifically test binding, Cp was immobilized on

340 Streptactin beads to prevent CLP assembly. Immobilized Cp was then incubated with  
341 <sup>32</sup>P-labeled RNAs representing site #1 or a mutated version identical to that generated  
342 in the virus mutant, either alone (first lanes) or in the presence of increasing amounts of  
343 an unlabeled random RNA pool (Fig. 6a; upper panels). Both RNAs bound to Cp, but  
344 the mutant site #1 RNA was more efficiently competed by random RNA. However, when  
345 the binding experiment was performed using Cp preincubated with poly(I:C) to shield  
346 non-specific electrostatic interactions, Cp specifically bound site #1 RNA even in the  
347 presence of increasing concentrations of random RNA (Fig. 6b; lower panel, left side).  
348 In contrast, under the same conditions Cp inefficiently bound the mutant RNA, and its  
349 binding was entirely competed by random RNA (Fig. 6b; lower panel, right side). Thus,  
350 Cp specifically and directly binds gRNA site #1 both in cells and *in vitro*, demonstrating  
351 that site #1 encompasses a motif that Cp specifically recognizes.

352 We next assessed whether Cp could specifically assemble with site #1 into  
353 CLPs. We found that poly(I:C) alone induced CLP formation (data not shown), in  
354 keeping with the ability of long anionic polymers such as heparin to promote CLP  
355 formation <sup>24</sup>. Therefore, to shield non-specific electrostatic interactions we instead used  
356 a 10 nucleotide DNA oligo (here termed 10mer) that is below the length needed to  
357 induce CLP formation <sup>20</sup>. We confirmed that CLPs did not form with the 10mer by  
358 negative stain electron microscopy (EM), which showed amorphous material but no  
359 detectable CLPs (Fig. 6b; upper panels). The addition of site #1 RNA produced  
360 abundant spherical CLPs of approximately 40 nm in diameter (Fig. 6b; lower),  
361 consistent in appearance to that of previously published CLPS <sup>20,22</sup>. We then quantitated  
362 CLP formation by sucrose gradient sedimentation and detection of Cp by ELISA (Fig.



363 6C and S5b). As predicted, Cp alone or incubated with 10mer (1:20 Cp:10mer) showed  
364 most Cp remained unassembled at the top of the gradient (Fig. 6c). Cp incubated with  
365 site #1 RNA alone (1:1 Cp:RNA) or in the presence of 10mer DNA (1:20:1  
366 Cp:10mer:RNA) showed a single peak centered toward the middle of the gradient (Fig.  
367 6c), consistent with previous sucrose gradient sedimentation analyses<sup>20</sup>. Thus, Cp  
368 robustly assembles into CLPs with site #1 RNA even in the presence of an excess of  
369 electrostatic competitor nucleic acid.

370 We then tested the effect of mutation of site #1's sequence on CLP assembly  
371 (Fig. 6d). Cp robustly assembled into CLPs with site #1 RNA in the presence of 10mer  
372 at physiological salt concentration (Fig. 6d, 150 mM NaCl panel). However, under the  
373 same conditions CLP formation with the mutant RNA was impaired (Fig. 6d, 150 mM  
374 NaCl panel). This decrease in CLP formation was more apparent when the assembly  
375 reaction's salt concentration was raised to shield non-specific electrostatic interactions.  
376 Site #1 induced some CLP formation even at 300 mM NaCl, while the mutant only  
377 assembled CLPs at 150 mM NaCl (Fig 6d). Thus, site #1 RNA specifically promotes  
378 CLP assembly *in vitro* even when general Cp electrostatic interactions are masked,  
379 suggesting that site #1 on the gRNA may also act to drive NC assembly in infected  
380 cells.

381

## 382 **DISCUSSION**

383 We employed PAR-CLIP and biotin-based Cp retrieval as an experimental  
384 approach uniquely suited to define the interactions of the alphavirus Cp with the  
385 genomic RNA. Our approach identified a set of high-confidence Cp binding sites on the

386 SFV gRNA, including a novel RNA sequence that specifically bound and assembled  
387 with Cp both in infected cells and *in vitro*. The Cp binding sites were preferentially  
388 distributed on the first 2/3 of the gRNA, suggesting a molecular rationale for the  
389 previously observed selective packaging of gRNA over sgRNA<sup>9-11</sup>. An overall  
390 preferential binding to gRNA-specific sequences was maintained across different NC  
391 assembly states. Such continuous engagement with gRNA-specific sequences can  
392 promote gRNA packaging and high infectivity.

393 A previous study used CLIP to identify SINV Cp interactions with the gRNA in  
394 infected cells<sup>12</sup>. Comparison with our results showed that the SINV and SFV Cp top  
395 binding sites do not overlap, and that SINV Cp's major binding sites are located within  
396 the last ~1/3<sup>rd</sup> of the gRNA sequence, overlapping with the sgRNA. Mutation of the  
397 SINV Cp binding sites does not affect gRNA packaging or NC assembly, but instead  
398 affects the stability of the incoming gRNA. These differences may reflect biological  
399 differences between SINV and SFV, but could also be due to differences in  
400 experimental approaches.

401 Alphavirus gRNA packaging signals were originally identified through analysis of  
402 DI-RNAs<sup>18,19,40</sup>. Although elegant studies showed that appending the SINV PS onto  
403 reporter or helper RNAs could increase their packaging in replicon systems and their  
404 direct binding to Cp *in vitro*, the increase was at most 5-fold<sup>18,41</sup>. Conversely, SINV or  
405 VEEV with mutated PSs are impaired but viable<sup>17</sup>. While our data are the first to show  
406 that the alphavirus Cp directly binds the DI-RNA-derived PS in cell culture, we also  
407 found that genome packaging within the SFV complex does not require the PS. Instead,  
408 our data argue that packaging involves preferential Cp binding to multiple gRNA-specific

409 sites. Although the relative importance of the PS appears to vary between alphavirus  
410 complexes, it seems clear that the PS is not strictly required for gRNA packaging/NC  
411 assembly. Given that recent studies indicate that DI-RNAs and defective viral genomes  
412 can have multifaceted functions (reviewed in <sup>42</sup>), the prior DI-RNA studies may have  
413 more complex interpretations than previously suspected.

414 We found that while mutation of multiple high affinity Cp binding sites did not  
415 significantly affect viral replication or protein expression, it significantly reduced  
416 infectious virus production. This correlated with reduced gRNA but elevated sgRNA  
417 levels in virus particles. Inhibition of infectious virus production was strongest at early  
418 stages of virus assembly, in keeping with increasing Cp concentrations at later times of  
419 infection driving Cp engagement with mutated binding sites. Based on our results we  
420 propose a mechanism for selective genome packaging via Cp's interactions with  
421 multiple sites selectively located on the gRNA (Fig. 7). At early stages of virus  
422 assembly, gRNA levels are high but intracellular Cp levels are relatively low, leading to  
423 Cp binding only to high affinity sites on the gRNA (Fig. 7, ia vs. ib). This stage may  
424 involve Cp dimers <sup>21</sup>, and could be represented by a proposed 90S NC assembly  
425 intermediate, which has a lower Cp:gRNA ratio than cellular NC <sup>43-45</sup>. For some  
426 alphaviruses such as SINV and VEEV, this early stage may involve strong engagement  
427 of Cp with the PS. As Cp levels accumulate in the cell, Cp begins engaging with lower  
428 affinity sites on the gRNA, enabling compaction of the gRNA molecule through charge  
429 neutralization <sup>15,37,46</sup> (Fig. 7, ii). More Cp would then be recruited to the assembling NC  
430 <sup>47</sup> (Fig. 7, iii), and Cp-Cp interactions and E2-Cp interactions would impose T=4  
431 icosahedral symmetry and promote budding, resulting in formation of the completed

432 viral NC and Cp-RNA interactions (Fig. 7, iv). Additional unknown factors may influence  
433 genome packaging and NC assembly, including specific subcellular locations or host  
434 factors.

435 From a broader perspective, a multi-site packaging mechanism could be  
436 favorable for many RNA viruses given that RNA polymerases generally have low  
437 fidelity. Their relatively high mutational frequency produces genetic diversity important  
438 for RNA virus adaption to environmental changes, but can also decrease virus fitness  
439 <sup>48,49</sup>. A multi-site packaging mechanism could help to ensure correct genome packaging  
440 even if deleterious mutations arose in several Cp binding sites. For example,  
441 retroviruses such as HIV-1 have high mutation rates and a defined packaging signal  
442 known as the  $\Psi$  element (reviewed in <sup>50</sup>). However,  $\Psi$  mutants only modestly decrease  
443 (~3-5 fold) infectious virus production or genome packaging <sup>32,51</sup>. Multi-site packaging  
444 mechanisms have been described for RNA viruses such as parechovirus 1 <sup>52</sup> and  
445 hepatitis B virus <sup>53</sup>, as reviewed in <sup>54</sup>. In addition, multi-site packaging may promote  
446 successful co-assembly of Cps and large ssRNAs while decreasing non-productive  
447 assembly pathways <sup>38</sup>. Thus, the multi-site-based packaging that we describe here for  
448 alphaviruses may be representative of a more general mechanism utilized by many  
449 RNA viruses to selectively package their genomes.

450 Our data represent the first demonstration of a discrete RNA sequence, site #1,  
451 with which alphavirus Cp specifically binds and assembles both in cells and *in vitro*.  
452 While multiple binding sites such as site #1 were maintained across virus assembly, we  
453 also observed discrete differences in Cp:gRNA interactions between the cellular and  
454 viral NCs. This could reflect changes induced by different chemical environments, or

455 could be induced by envelope protein association and virus budding. Changes in NC  
456 architecture during various stages of virus exit have been previously observed using  
457 morphological and biochemical techniques<sup>55-58</sup>. Our data thus suggest that such  
458 changes in the NC structure also significantly affect Cp-gRNA binding. If E2  
459 interactions/budding affect Cp-gRNA interactions, this would suggest that changes in  
460 NC architecture are propagated from the outer, envelope-protein interacting face of the  
461 NC shell to the inner RNA core of the virus particle. Further functional analyses are  
462 needed to determine the potential importance of such changes in virus Cp-RNA  
463 interactions during exit.

464

#### 465 **Acknowledgements**

466 We thank all of the members of the Kielian lab and Dimitrios Zattas for helpful  
467 discussions and comments on the manuscript. We thank Matthew Angeliadis for  
468 technical assistance. We thank the Einstein Analytical Imaging Facility and facility  
469 members Xheni Nishku and Timothy Mendez for training and technical assistance on  
470 the electron microscope. We thank Susan Buhl and Matthew Scharff for technical  
471 assistance and use of their plate reader.

472 This work was supported by grants to M.K. from the National Institute of General  
473 Medical Sciences (R01-GM057454) and the National Institute of Allergy and Infectious  
474 Diseases (R01-AI075647) and by Cancer Center Core Support Grant NIH/NCI P30-  
475 CA13330. R.S.B. was supported by an NIH NRSA (F32-GM122450) postdoctoral  
476 fellowship and the Charles H. Revson Senior Fellowship in Biomedical Sciences. M.H.  
477 and D.G.A are supported by the Intramural Research Program of the National Institute

478 of Arthritis and Musculoskeletal and Skin Diseases. The content of this paper is solely  
479 the responsibility of the authors and does not necessarily represent the official views of  
480 the National Institute of General Medical Sciences, the National Institute of Allergy and  
481 Infectious Diseases, National Institute of Arthritis and Musculoskeletal and Skin  
482 Diseases, or the National Institutes of Health.

483

484 **Author contributions:**

485 R.S.B. and M.K. conceived the project. R.S.B. and D.G.A. made the PAR-CLIP libraries.  
486 D.G.A. performed the *in vitro* binding assay. R.S.B. performed all other experiments.  
487 M.K. and M.H. supervised the research. R.S.B. and M.K. wrote the original draft. R.S.B.,  
488 D.G.A., M.H., and M.K. reviewed and edited the draft.

489

490 **Declaration of interests:**

491 R.S.B., D.G.A, M.H. and M.K. declare no competing interests.

492

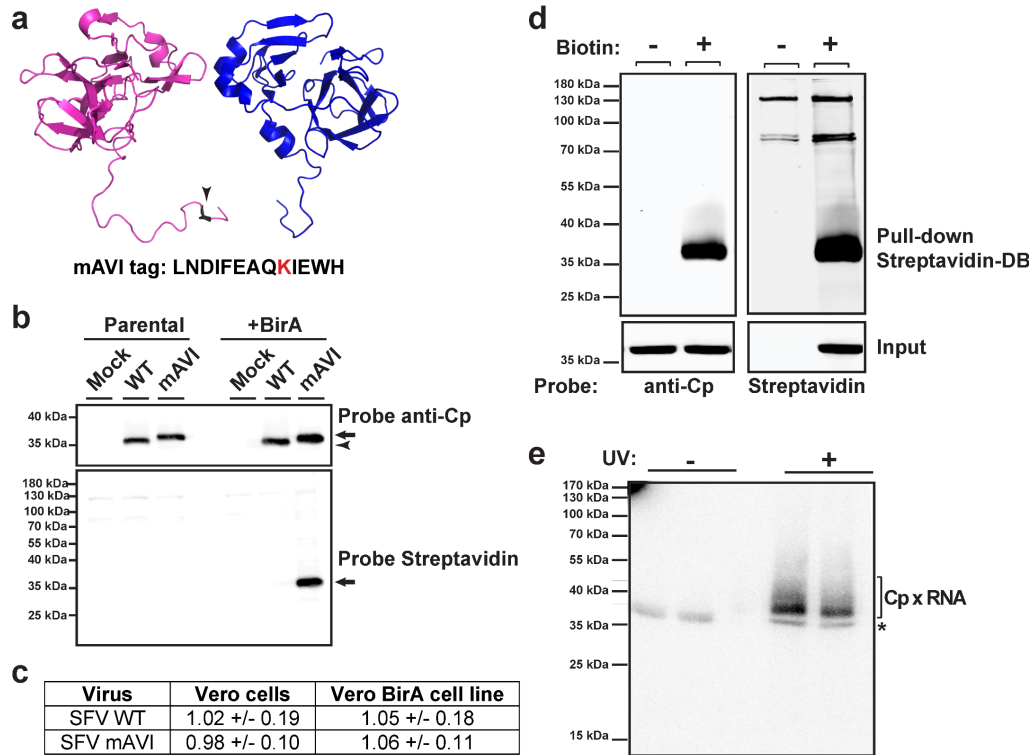

493

494 **Figure 1. Properties and retrieval of SFV Cp using mAVI tag.** (a) Partial structure of  
 495 Eastern Equine encephalitis virus Cp dimer encompassing (on the left) Cp residues 85-  
 496 261 (PDB: 6MX7)<sup>59</sup>. Arrowhead indicates the homologous location where the mAVI tag  
 497 was inserted in SFV Cp. The highlighted lysine residue within the mAVI tag sequence is  
 498 the target for BirA biotinylation. (b) Vero parental or Vero BirA (+BirA) cells were mock-  
 499 infected, infected with SFV WT, or infected with SFV mAVI. At 7.5 hpi, lysates were  
 500 harvested, subjected to SDS-PAGE, and analyzed by western blot using a polyclonal  
 501 antibody against Cp or a Streptavidin Alexa-680 probe. Arrowhead indicates Cp WT,  
 502 and arrows indicate Cp-mAVI. (c) Specific infectivity was measured as the ratio of the  
 503 number of infectious particles (determined by plaque assay) to the number of total  
 504 particles (determined by quantitative western blot of purified virus using an E2-specific  
 505 antibody). Data are the average and range from two independent experiments. Units  
 506 represent ratio of PFU/E2 signal. (d) Vero BirA cells were grown in biotin-depleted  
 507 media for 3 days (-biotin) or grown in normal media (+biotin). Cells were infected with  
 508 SFV mAVI, and lysates were harvested at 7.5 hpi, retrieved with Streptavidin  
 509 DynaBeads (SA-DB), and analyzed by SDS-PAGE and western blot using a monoclonal  
 510 antibody against Cp or a Streptavidin Alexa-680 probe. (e) Autoradiogram of Cp-RNA  
 511 crosslinked adducts retrieved with SA-DB from Vero BirA cells infected with SFV mAVI  
 512 (representative of n=2 independent experiments). Asterisk indicates an infection- and  
 513 UV-independent band (Figure S1e). See also Figure S1.

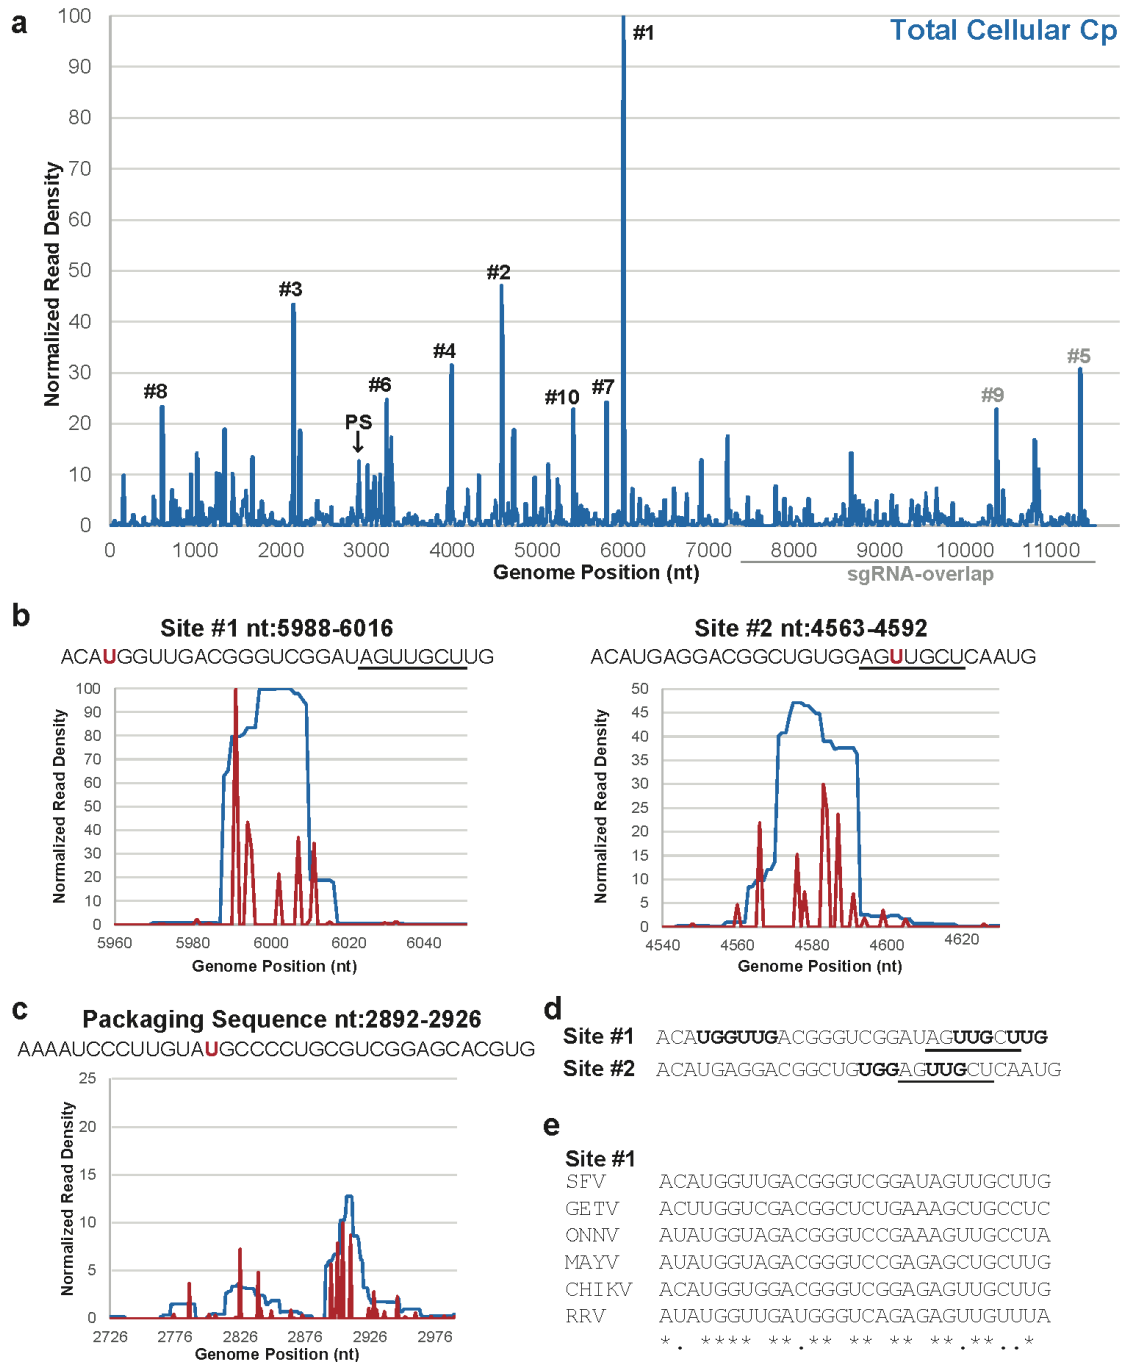

514

515 **Figure 2. Cp's genomic RNA binding sites in cells.** (a) Normalized read density from  
 516 two independent PAR-CLIP experiments plotted across genome nucleotide position.  
 517 Reads were normalized to the nucleotide position with the highest read frequency within  
 518 the library, which were read values of 14,134 and 13,343, before averaging. Arrow  
 519 indicates Cp's specific binding site within the Full PS, #1 indicates site #1, #2 indicates  
 520 site #2, etc. Gray line represents the sgRNA-overlapping region of the gRNA. (b)  
 521 Normalized read density (blue lines) across site #1 (nt:5988-6016; left) and site #2  
 522 (nt4563-4592; right), and the normalized read frequencies of the T-to-C mutations (red



523 lines). T-to-C frequencies were normalized to the T with the highest C mutation  
524 frequency within each library replicate, which were frequencies of 5,386 and 4,750,  
525 before averaging. The T/U residue with the most C mutations for each site is highlighted  
526 in red within their respective sequence. The 7 identical nucleotides between site #1 and  
527 2 are underlined. (c) As in (b), but for the Full PS (nt:2726-2991). The sequence  
528 corresponding to the Cp-PS binding site (nt:2892-2926) is shown at the top, with the  
529 T/U residue with the most C mutations highlighted in red. (d) Site #1 and #2 sequences.  
530 Bolded nucleotides are either “UUG” or “UGG” motifs. The 7 identical nucleotides  
531 between site #1 and 2 are underlined. (e) Sequence alignment of site #1 with the  
532 homologous sites in SFV complex members GETV (AY702913.1), CHIKV  
533 (EF452493.1), MAYV (AF237947.1), ONNV (M20303.1), and RRV (GQ433359.1).  
534 Asterisks indicate nucleotide identity, and periods indicate nucleotide similarity. See  
535 also Figure S2, Figure S3, Figure S4, Table S1, and Table S2.  
536

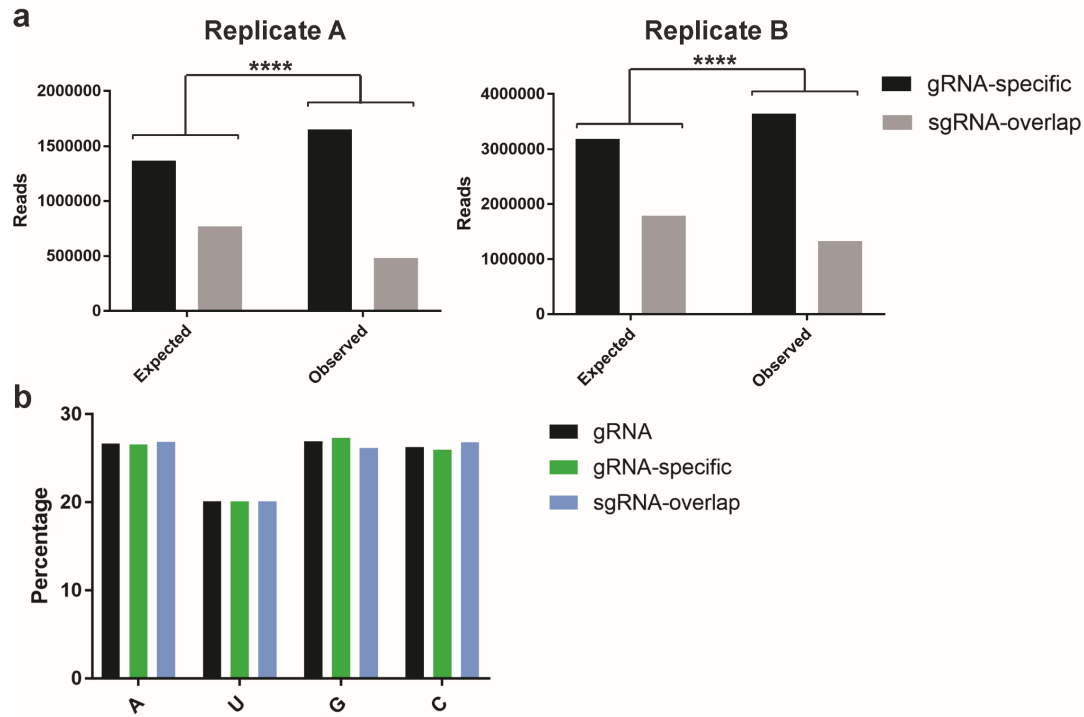

537

538 **Figure 3. Cp preferentially binds genome-specific sequences.** (a) Chi-square  
539 analysis test for replicate libraries (Rep A and Rep B) comparing the expected vs.  
540 observed number of sequence reads summed per nucleotide position mapping to  
541 gRNA-specific sequences (black) or sequences that overlap with the sgRNA (gray).  
542 Two-sided, df=1, \*\*\*\* indicates  $p < 0.0001$ . (b) Nucleotide composition of the gRNA,  
543 gRNA-specific sequences, and sequences that overlap with the sgRNA.  
544

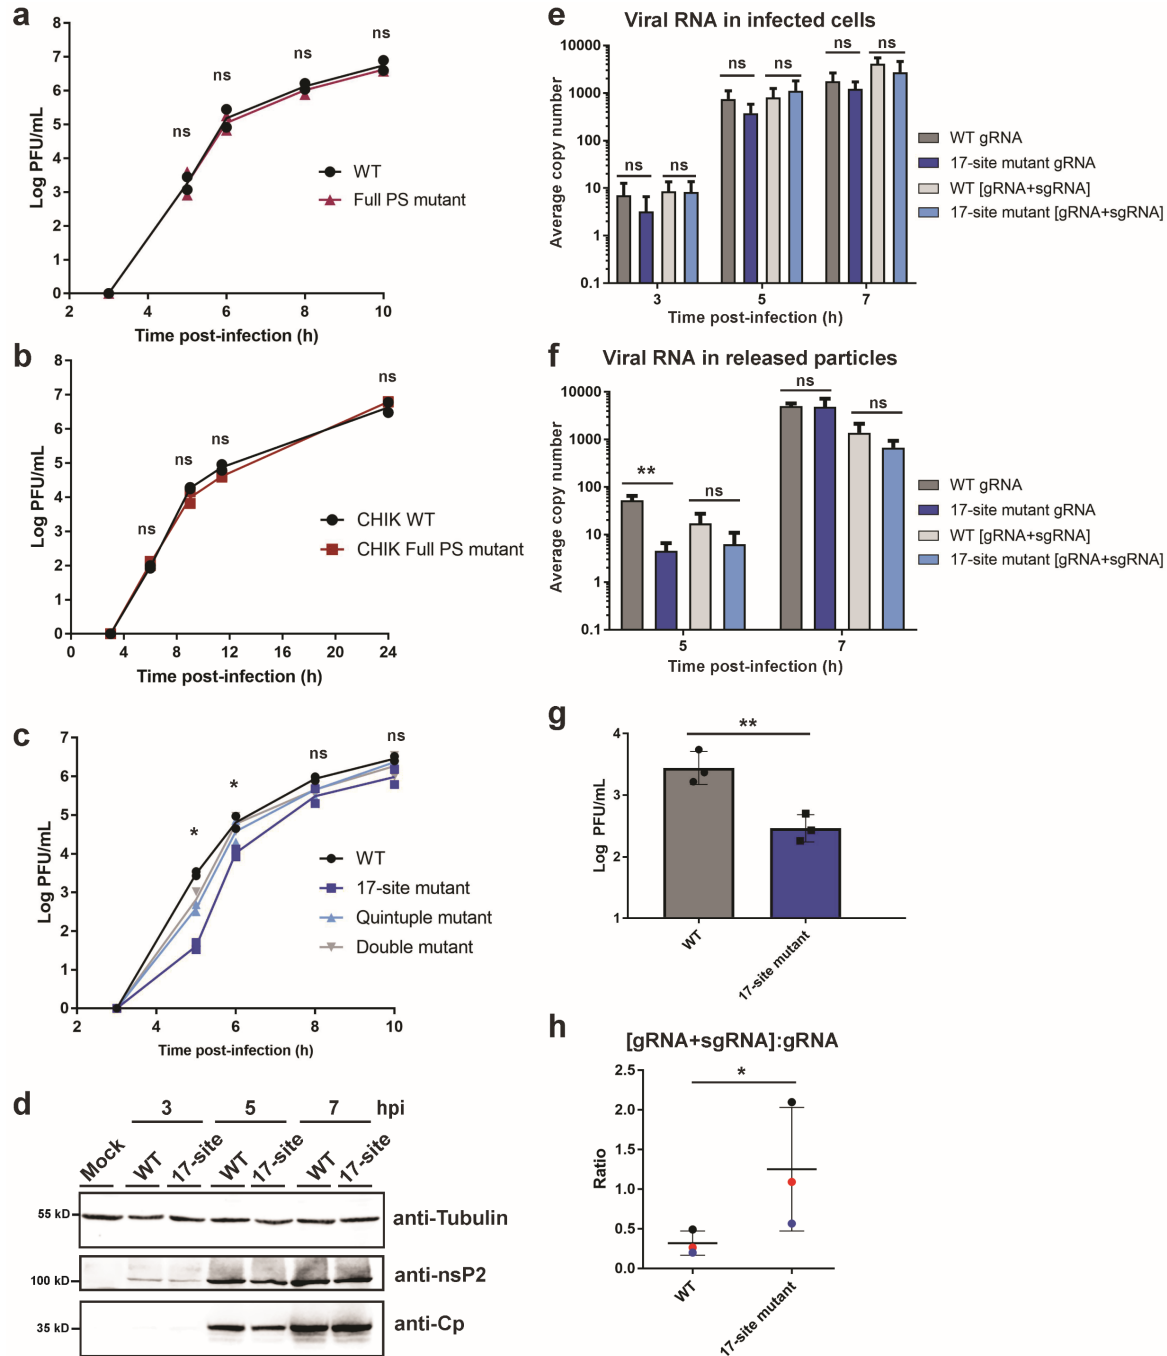

545

546 **Figure 4. Mutation of multiple Cp binding sites inhibits infectious virus production**  
 547 **independent of the PS.** (a) Vero cells were infected with SFV WT or Full PS mutant at  
 548 MOI=0.01. Media from the indicated time points were titered by plaque assay. Individual  
 549 points from n=2 were plotted. Student's t-tests compared WT vs. Full PS mutant; ns  
 550 denotes no significant difference. (b) As in (a), but with CHIKV WT and CHIKV Full PS  
 551 mutant at MOI=0.01. (c) As in (a) and (b), but with SFV WT, 17-site mutant, Quintuple  
 552 mutant (sites #1-4 and Cp-PS binding site), and Double mutant (sites #1 + 2). Student's  
 553 t-tests compared WT vs. 17-site mutant; \* denotes p<0.05. (d) Lysates from Vero cells

554 mock infected, or infected with SFV WT or the 17-site mutant at MOI=10 were analyzed  
555 by western blot for tubulin, nsP2 or Cp. Representative images of n=2. (e) Total cellular  
556 RNA was extracted from Vero cells infected with SFV WT or 17-site mutant at  
557 MOI=0.01. gRNA and [gRNA+sgRNA] copy numbers in infected cells were determined  
558 by RT-qPCR and represent the average per 5 ng of total RNA (n=3). Student's t-tests  
559 compared copy numbers. (f) Media from Vero cells infected with SFV WT or 17-site  
560 mutant at MOI=0.01 were pelleted to isolate virus particles. gRNA and [gRNA+sgRNA]  
561 copy numbers were determined as in (e) and represent the average copy number per  
562 10% of the pelleted samples (n=3). Student's t-tests compared copy numbers; \*\*  
563 denotes  $p < 0.01$ . (g) SFV WT and 17-site mutant samples from the 5 h time point in (f)  
564 were titered by plaque assay. Error bars represent standard deviation. Student's t-test  
565 compared WT and 17-site mutant titers; \*\* denotes  $p < 0.01$ . (h) The ratio of  
566 [sgRNA+gRNA] to gRNA levels from the 5 h time point in (f) for SFV WT and 17-site  
567 mutant. The thick black horizontal bar represents the mean and the thin horizontal bars  
568 represent the standard deviation. Paired replicates are plotted in the same color.  
569 Student's t-test compared the ratios; \* denotes  $p < 0.05$ . See also Figure S4 and Table  
570 S3.  
571  
572

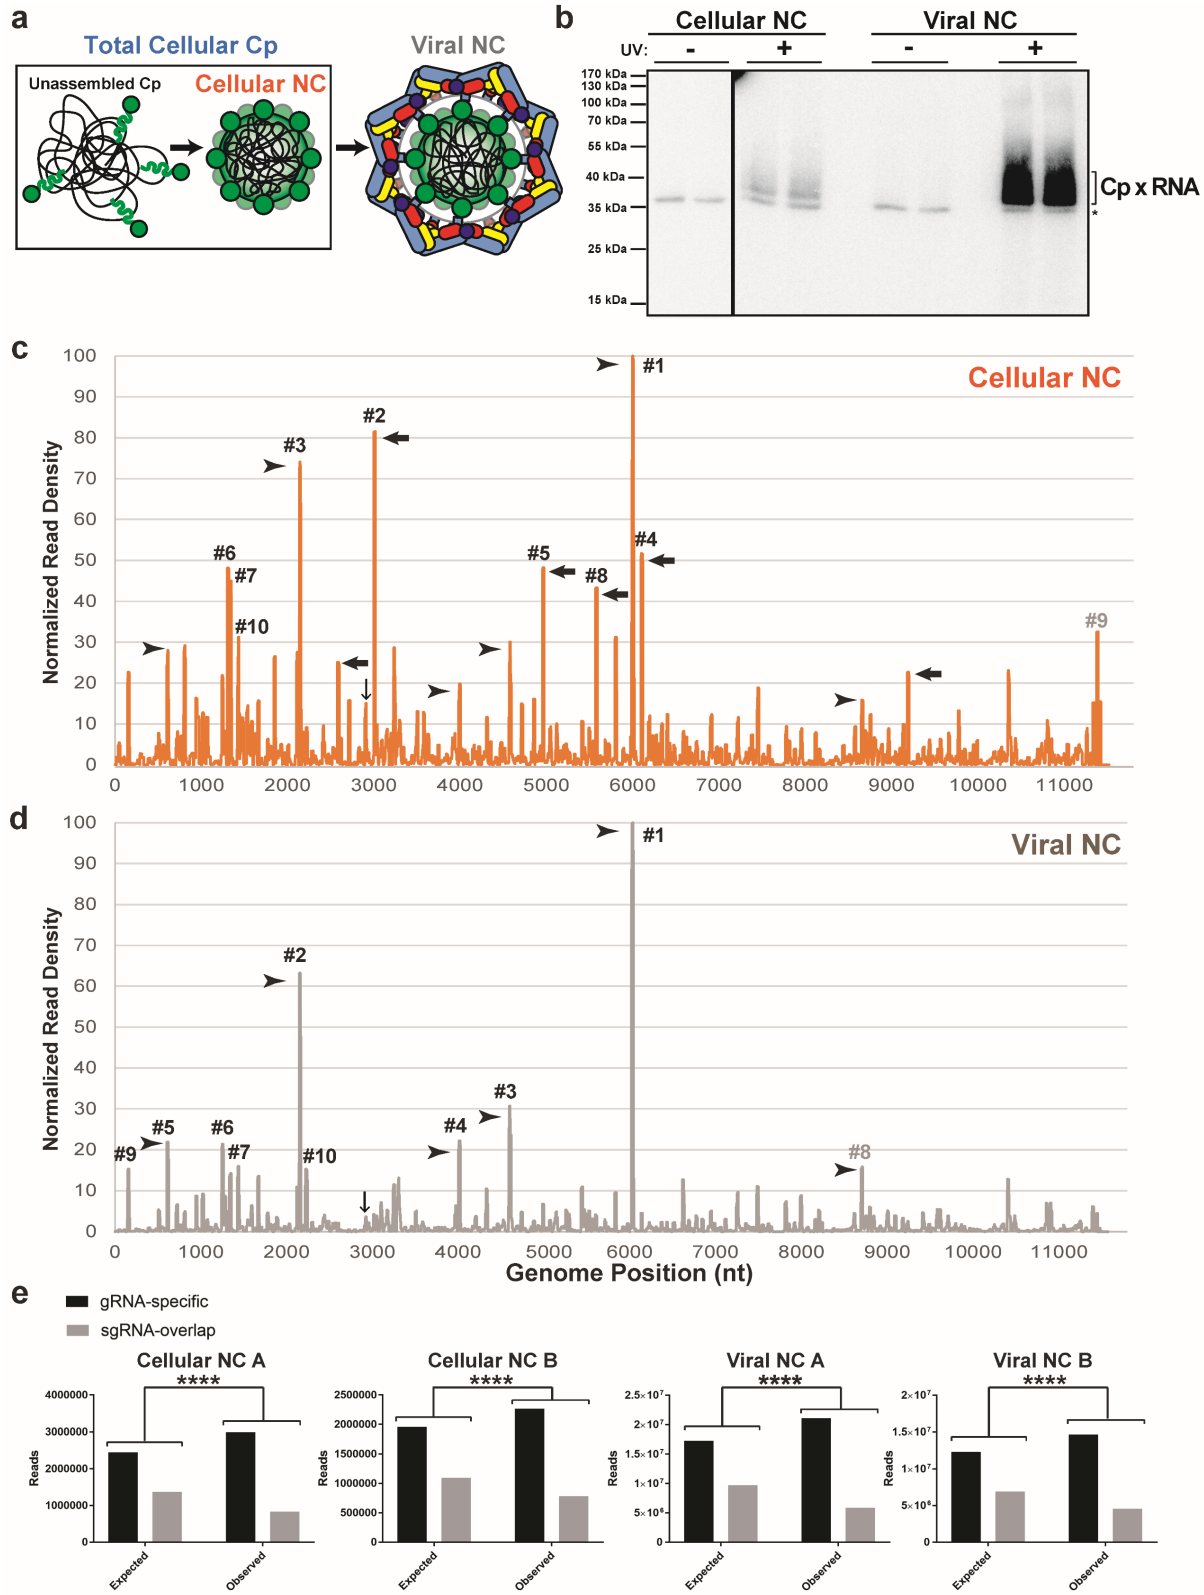

573

574 **Figure 5. Changes in Cp-gRNA interactions triggered by virus budding.** (a)  
 575 Schematic of the different Cp and NC populations present during virus assembly. Cp

576 (green), gRNA (black), E2 (pale blue), and E1 (colored by domain: dIII blue, dII yellow,  
577 and dI red). (b) Autoradiogram of Cp-RNA crosslinked adducts as in Figure 1e, but for  
578 purified cellular NC and viral NC. (c) and (d) Normalized read densities as in Fig. 2a, but  
579 for cellular NC (c) and viral NC (d). Reads were normalized to the nucleotide position  
580 with the highest read frequency within each library, which were read values of 10,143  
581 and 5,855 for cellular NC and 140,546 and 88,226 for viral NC, before respectively  
582 averaging. Downward-facing arrow indicates Cp's specific binding site on the PS, and  
583 numbered sites represent the top 10 sites bound for each respective sample type.  
584 Arrowheads indicate examples of Cp binding sites maintained throughout virus  
585 assembly, and leftward-pointed arrows indicate examples of distinct Cp interactions  
586 enriched only in the cellular NC assembly state. (e) Chi-square analysis test as in  
587 Figure 3a, but for cellular NC and viral NC replicate libraries. Two-sided,  $df=1$ , \*\*\*\*  
588 indicates  $p < 0.0001$ . See also Figure S2 and Table S2.  
589

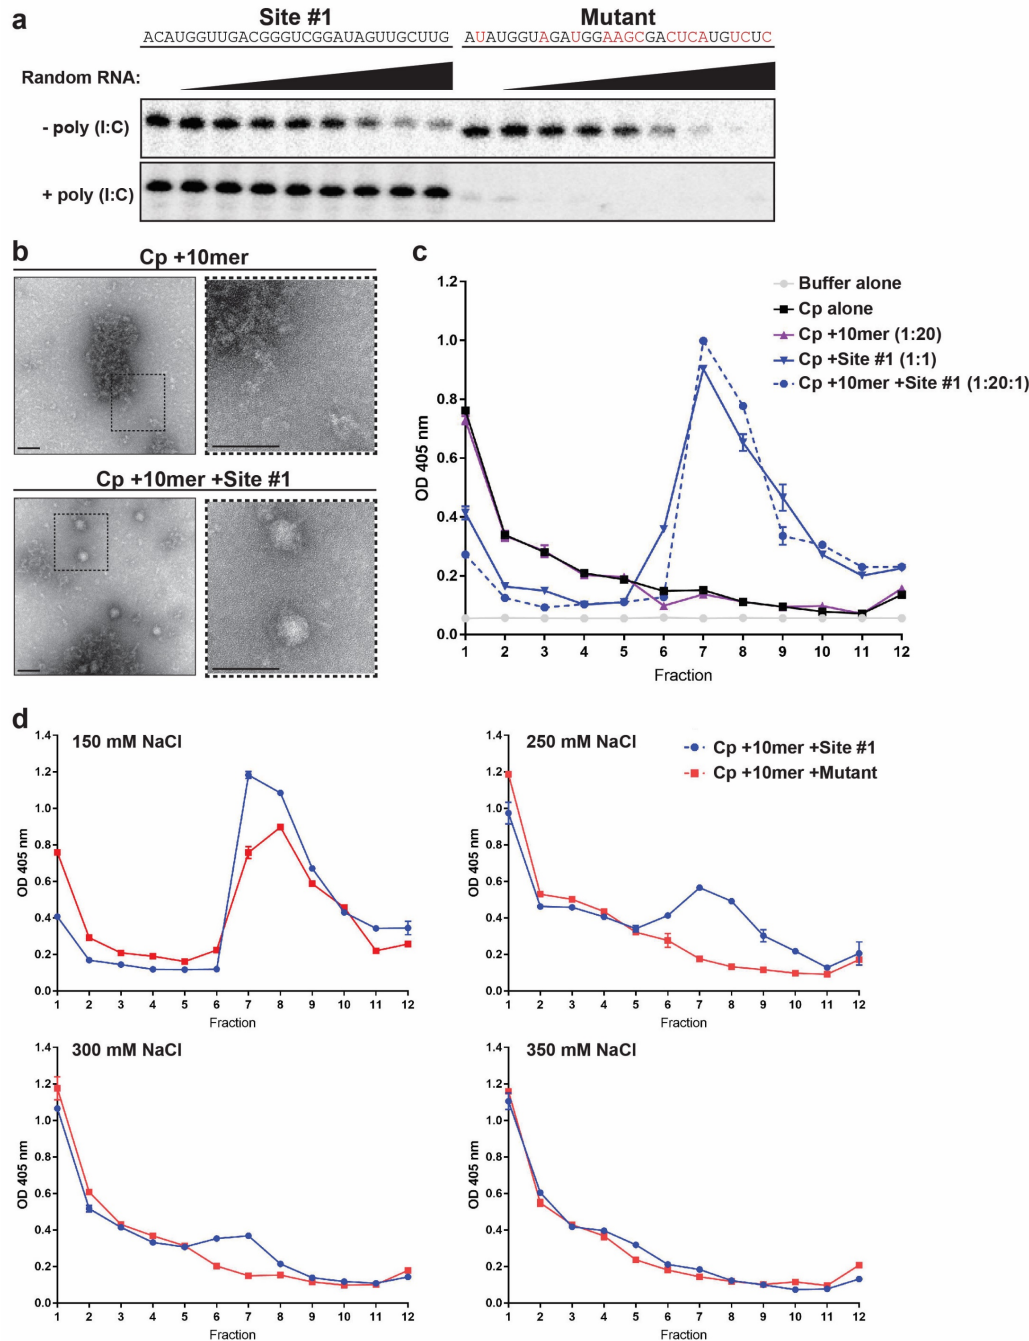

590

591

592

593

594

595

596

597

598

599

600

**Figure 6. Cp specifically binds and assembles with site #1 *in vitro*.** (a) Upper panel: 333 nM  $^{32}$ P-labeled site #1 (left) or mutant (right; mutated residues highlighted in red) RNAs were bound to 13.3 pmole Cp immobilized on Streptactin beads in a 30  $\mu$ L reaction. Increasing concentrations (4-1000 nM) of random RNA were added as a competitor. Bound RNAs were extracted and subjected to Urea-PAGE followed by autoradiography. Lower panel: as above, but immobilized Cp was first preincubated with 20  $\mu$ g/mL of poly(I:C) to shield non-specific electrostatic interactions. Results are representative of two independent experiments. (b) Negative stain EM of CLP assembly reactions of Cp +10mer or Cp +10mer +Site #1 RNA. Dashed boxes in the right panel are 3X magnification of the corresponding left panel. Scale bar is 80 nm. Images

601 represent one experiment. (c) CLP assembly reactions were incubated for 30 min at  
602 25°C (150 mM NaCl) and then analyzed by sucrose gradient sedimentation. Cp from  
603 aliquots of fractions was detected by ELISA. Average absorbances are plotted from  
604 duplicate samples with error bars showing the range. Fraction 1 is the top of the  
605 gradient. (d) As in (c), except the indicated salt concentrations were used in CLP  
606 assembly reactions comparing CLP assembly with site #1 or mutant RNAs. Graphs in  
607 (c) and (d) are representative examples of 2-4 independent experiments. See also  
608 Figure S5.  
609



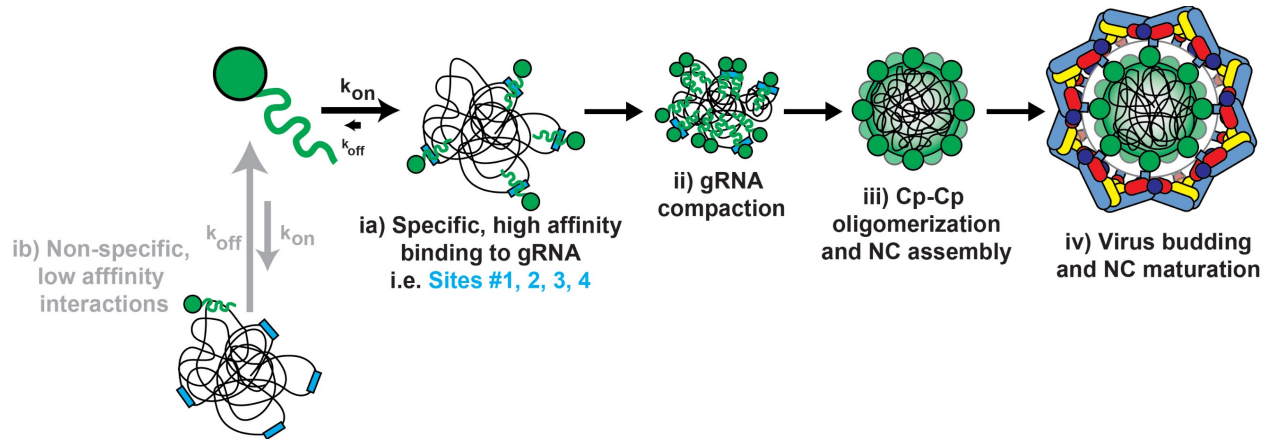

610

611 **Figure 7. A multi-site genome packaging model for alphaviruses.** ia) Cp (green)  
612 specifically interacts with its high affinity sites (blue rectangles) on the gRNA (black  
613 lines) and stably binds them. ib) Cp can also non-specifically interact with low-affinity  
614 sites on the gRNA or other RNAs such as the sgRNA or cellular RNAs (not shown), but  
615 binding is not stable. ii) As Cp levels increase in the cell, Cp continues to engage  
616 multiple high affinity sites on the gRNA, enabling genome compaction. iii) Further Cp  
617 recruitment leads to Cp oligomerization and full NC assembly. iv) Virus assembly and  
618 budding cause discrete changes in Cp:gRNA contacts within the viral NC.  
619

## 620 **METHODS**

621

### 622 **Cells**

623 Baby hamster kidney (BHK-21) cells (gift from Dr. Ari Helenius) were cultured in  
624 Dulbecco's modified Eagle's medium (DMEM, HyClone) containing 4 mM L-glutamine,  
625 100 U penicillin/mL, 100 µg streptomycin/mL, 10% tryptose phosphate broth, and 5%  
626 FBS at 37°C. Vero cells (ATCC; gift from Dr. Kartik Chandran) were cultured in DMEM  
627 containing 4 mM L-glutamine, 100 U penicillin/mL, 100 µg streptomycin/mL, and 10%  
628 FBS at 37°C. Vero cells stably expressing HA-BirA were generated by transfecting cells  
629 with the expression plasmid described below using Lipofectamine 2000 (Invitrogen). 48  
630 h post-transfection, cells were split to 25% confluency and selected with 1 mg G418/mL  
631 (Sigma-Aldrich) for two weeks. G418-resistant cells were then seeded sparsely and  
632 individual clones isolated using cloning cylinders (Corning). Clones were screened for  
633 their ability to biotinylate Cp-mAVI by western blot and fluorescence microscopy using  
634 streptavidin probes. Cell lines were authenticated by morphologic evaluation and were  
635 checked for mycoplasma contamination (MycoAlert™ PLUS Mycoplasma Detection Kit,  
636 Lonza).

### 637 **Antibodies**

638 The following antibodies and SA probes were used for western blots and  
639 immunofluorescence as indicated: Rabbit polyclonal anti- $\alpha$  tubulin (Abcam, 18251),  
640 Rabbit polyclonal anti-E2/E1<sup>60</sup>, monoclonal anti-Cp (42-1)<sup>61</sup>, monoclonal anti-E2 (E2-  
641 1)<sup>62</sup>, Streptavidin Alexa Fluor 680 Conjugate (ThermoFisher Scientific, S32358). Rabbit  
642 polyclonal anti-nsP2 was a gift from Dr. Andres Merits. Rabbit polyclonal anti-Cp was

643 generated (Covance) against the C-terminal domain of SFV Cp (residues 119-267)  
644 expressed and purified as described below for full-length Cp. Specificity was confirmed  
645 by western blot, immunofluorescence of uninfected vs. infected cells, and co-staining  
646 with monoclonal antibody 42-1.

#### 647 **Viruses, mutants, and plasmids**

648 A minimal biotin acceptor motif (mAVI tag; LNDIFEAQKIEWH)<sup>29,30</sup> was inserted after  
649 Cp residue 95 by overlapping PCR using restriction sites XbaI and NsiI in the SFV  
650 infectious clone pSP6-SFV4<sup>63</sup>. Overlapping PCR primers:

651 5'CTGAACGACATCTTCGAGGCCCGAGAAAATCGAATGGCACaagcaagccgacaag3' and  
652 5'GTGCCATTCGATTTTCTGGGCCTCGAAGATGTCGTTTCAGgtcttcttctttgctgc3'.

653 Individual Cp binding site mutants were constructed by overlapping PCR and using the  
654 nearest unique restriction sites present in pSP6-SFV4. Double and Quintuple Cp  
655 binding site mutants were constructed by restriction digest and subcloning from  
656 individual mutants. The 17-site mutant, Full PS mutant, and 17-site + Full PS mutant  
657 were custom synthesized (Epoch Life Science, Inc), and subcloned by restriction digest  
658 into pSP6-SFV4. The Chikungunya Full PS mutant was custom synthesized (Epoch Life  
659 Science, Inc) and subcloned by restriction digest into the pSinRep5-181/25  
660 Chikungunya infectious clone (kindly provided by Dr. Terrence Dermody<sup>64</sup>). All  
661 infectious clone mutants were verified by sequencing the entire region affected by the  
662 cloning approach (Genewiz, South Plainfield, NJ) and analyzed by restriction digest to  
663 check for plasmid rearrangements. A humanized BirA construct was provided by Vasily  
664 Ogryzko<sup>65</sup> and subcloned into pcDNA3.1+ with an N-terminal HA-tag added by PCR.

#### 665 **Virus stocks**

666 SFV WT and mAVI virus stocks were generated by electroporating BHK cells with *in*  
667 *vitro* transcribed (IVT) viral RNA and collecting the cell media at 24 h post-  
668 electroporation<sup>63</sup>. Virus-containing media were clarified by centrifugation at 10,621 X g  
669 4°C for 10 min, and 10 mM HEPES pH 8.0 was added to the supernatant before  
670 aliquoting and freezing. Virus stocks for growth comparisons of SFV WT, Full PS  
671 mutant, and the indicated Cp binding site mutants were generated the same way except  
672 that the cell media were collected at 8 h post-electroporation. CHIKV WT and Full PS  
673 mutant stocks were generated as above except that the cell media were harvested at 22  
674 h post-electroporation. All virus stocks were titered in two independent experiments by  
675 plaque assay on BHK cells.

#### 676 **Virus growth curves**

677 Growth curves were performed on Vero cells infected at the indicated multiplicity of  
678 infection (MOI) for 1.5-2 h at 37°C. At the indicated time points, the virus-containing  
679 media were collected, clarified, aliquoted and frozen at -80°C. Aliquots were titered via  
680 plaque assay on BHK cells.

#### 681 **Cell lysis and western blot**

682 Vero parental or Vero+BirA cell lines were infected at an MOI=10 for 1.5 h at 37°C  
683 before transfer into fresh medium containing 50 µM biotin. At the indicated time points,  
684 the cells were washed and lysed with lysis buffer [50 mM Tris-Cl pH 7.4, 100 mM NaCl,  
685 1% Triton-X-100, 1 mM EDTA, 6 mM NaPPi (to inhibit post-lysis biotinylation), and an  
686 EDTA-free protease inhibitor cocktail (Roche; 1 tablet/10 mL)] on ice. The lysate was  
687 then clarified by centrifugation and the soluble lysate was frozen at -80°C. Lysates were  
688 subjected to SDS-PAGE followed by transfer to nitrocellulose membranes. Membranes

689 were probed with the indicated primary antibodies and corresponding secondary  
690 antibodies conjugated to Alexa Fluor 680 or 800 dyes before imaging on an Odyssey Fc  
691 Imaging System (LI-COR Biosciences).

## 692 **Immunofluorescence**

693 Vero parental or Vero+BirA cells were infected at an MOI=1 for 1.5 h at 37°C, and then  
694 fresh medium supplemented with 50 µM biotin was added to each well. At 7 hpi, the  
695 cells were fixed with 4% paraformaldehyde (Electron Microscopy Sciences) and  
696 quenched with 50 mM NH<sub>4</sub>Cl. The cells were permeabilized with 0.1% Triton-X-100 and  
697 blocked with 0.2% gelatin. Coverslips were then stained with the indicated primary  
698 antibodies followed by the corresponding secondary antibody conjugated to an Alexa-  
699 Fluor dye. Images were acquired on a Zeiss Axiovert 200 M microscope and processed  
700 using ImageJ.

## 701 **Transmission electron microscopy**

702 Vero parental and Vero+BirA cell lines were infected with SFV WT or mAVI at an  
703 MOI=10 for 1.5 h at 37°C, before supplementing with fresh medium containing 50 µM  
704 biotin. At 7.5 hpi, the cells were washed once with serum-free medium and then fixed  
705 with 2.5% glutaraldehyde and 2% paraformaldehyde in 0.1 M sodium cacodylate buffer  
706 for 30 minutes at room temperature. The Einstein Analytical Imaging Facility then  
707 processed the samples by postfixing with 1% osmium tetroxide and 2% uranyl acetate.  
708 The samples were dehydrated and embedded, and thin sections were stained with  
709 uranyl acetate followed by lead citrate. Images were taken on a JEOL 1200EX electron  
710 microscope at 80 kV and assembled using Adobe Photoshop software. For negative  
711 stain analysis of CLP assembly reactions, 5 µL of sample was applied to glow-

712 discharged carbon-coated copper grids and stained with 1% v/v uranyl acetate. Grids  
713 were air dried and then viewed on a FEI Tecnai 20 electron microscope at 120 kV.

#### 714 **Specific Infectivity**

715 Vero parental and Vero+BirA cells were infected at an MOI=10 for 1.5 h at 37°C before  
716 supplementing with fresh medium containing 50 µM biotin. At 7.5 hpi, the virus-  
717 containing media were collected and clarified by centrifugation. An aliquot was taken  
718 from the clarified supernatant for titering by plaque assay to determine infectious  
719 particle number. The remaining supernatant was layered over a 20% sucrose cushion  
720 and centrifuged at 35,000 rpm (Beckman Coulter SW41 rotor) for 3 h at 4°C. The  
721 pelleted virus was resuspended in TN buffer [50 mM Tris-Cl pH 7.4, 100 mM NaCl, and  
722 a protease inhibitor cocktail (Roche; 1 tablet/10 mL)] on ice overnight. Virus  
723 suspensions were serially diluted, boiled in SDS sample buffer, and subjected to SDS-  
724 PAGE followed by western blot using an E2-specific monoclonal antibody. E2 signal  
725 was imaged and quantified using the Odyssey Fc Imaging System (LI-COR  
726 Biosciences) to determine particle number. The specific infectivity was calculated as a  
727 ratio of the infectious particle number (plaque forming units) to the E2 signal (total  
728 particle number).

#### 729 **PAR-CLIP**

730 PAR-CLIP on SFV Cp was performed based on previously described methods<sup>66-69</sup>.

731 *Total cellular Cp population:* Vero+BirA cells were counted and seeded in 35 mm dishes  
732 24 h before infection. The cells were infected with SFV mAVI at an MOI=10 for 1.5 h,  
733 washed three times, and then placed into media supplemented with 50 µM biotin and  
734 100 µM 4-thiouridine. At 7 hpi, the cells were UV-irradiated with 368 nm light at 0.15

735 J/cm<sup>2</sup>, or control cells were mock UV-irradiated. Cells were then placed on ice, washed  
736 three times with PBS, and then lysed with lysis buffer (50 mM Tris-HCL pH 7.4, 100 mM  
737 NaCl, 1% NP-40, 1 mM EDTA, 6 mM NaPPi, 0.5 mM DTT, and a complete protease  
738 inhibitor tablet (Roche; 1 tablet/10 mL)) for 10 min with gentle rocking. The lysate was  
739 clarified by centrifugation at 13,000 rpm 4°C for 10 min. The soluble lysate was then  
740 treated with RNaseT1 (1 U/uL) for 15 min at room temperature and then placed on ice  
741 for 5 min. The samples were then frozen at -80°C and a 5% input control was taken at  
742 this step to compare Cp expression levels by western blot (Fig. S2c). Streptavidin  
743 Dynabeads (SA-DB; Dynabeads MyOne Streptavidin C1, ThermoFisher Scientific) were  
744 equilibrated with PBS while samples thawed on ice. A final concentration of 0.5% SDS  
745 was added to the samples, mixed, and then incubated with the SA-DB by rocking at 4°C  
746 for 3 h. The SA-DB were then washed twice with RIPA buffer supplemented with high  
747 salt (10 mM Tris-Cl pH 7.4, 0.5 M NaCl, 1 mM EDTA, 1% NP-40, 1% sodium  
748 deoxycholate, 0.1% SDS, 0.5 mM DTT, and a complete protease inhibitor tablet  
749 (Roche; 1 tablet/10 mL)) for 5 minutes per wash, once with PBS, and treated with  
750 RNaseT1 at 1 U/μL for 15 min at room temperature before cooling on ice for 5 min. The  
751 SA-DB were washed again with high salt RIPA buffer for 5 min, then washed twice with  
752 dephosphorylation buffer (50 mM Tris-Cl pH 7.9, 100 mM NaCl, 10 mM MgCl<sub>2</sub>, and 1  
753 mM DTT), and treated with calf-intestine phosphatase at 0.5 U/μL for 10 min at 37°C.  
754 The SA-DB were washed once with lysis buffer, twice with PNK buffer (50 mM Tris-Cl  
755 pH 7.5, 50 mM NaCl, 10 mM MgCl<sub>2</sub>, 5 mM DTT) lacking DTT, then resuspended in  
756 complete PNK buffer. 1 U/μL of T4 PNK and 0.5 μCi/uL of <sup>32</sup>P-ATP were added to the  
757 SA-DB for 30 min at 37°C with gentle mixing every 5 min. After 30 min, 100 μM cold

758 ATP was added for 5 min at 37°C. The SA-DB were washed five times with PNK buffer  
759 without DTT and then once with PBS. Samples were boiled for 5 min in SDS sample  
760 buffer four sequential times to maximize elution before pooling eluates. The eluates  
761 were subjected to SDS-PAGE and then transferred to nitrocellulose membranes for  
762 autoradiography. The film was overlaid on top of the membrane and the corresponding  
763 CpxRNA crosslinked adducts were excised from the membrane. The membrane was  
764 treated with proteinase K for 90 minutes at 55°C, and the RNA was extracted with  
765 phenol-chloroform and precipitated.

766 *Cellular and viral NCs:* PAR-CLIP on cellular and viral NCs was performed as described  
767 above, but with the following differences. Two 10 cm plates of Vero+BirA cells were  
768 infected with SFV mAVI at an MOI=10. At 7.5 hpi, the virus-containing media were  
769 collected and clarified by centrifugation at 10,000 rpm for 5 min at 4°C. The virus was  
770 then purified over a 20% sucrose cushion by centrifugation at 35,000 rpm (Beckman  
771 Coulter SW41 rotor) for 3 h at 4°C. The pellet was resuspended on ice for 3 h in TN  
772 buffer and then transferred to a 35 mm dish. The virus was UV irradiated or mock  
773 irradiated with 368 nm light at 0.15 J/cm<sup>2</sup>, and then lysed in lysis buffer, denatured with  
774 0.5% SDS, and processed as described under *Total cellular Cp population*. The cells  
775 from the same plates were washed with PBS and then UV-irradiated with 368 nm light  
776 at 0.15 J/cm<sup>2</sup> or mock-irradiated. Cells were pelleted, lysed in lysis buffer, clarified by  
777 centrifugation at 13,000 rpm for 10 min at 4°C, and then treated with 25 mM EDTA for  
778 20 min to dissociate polysomes. Samples were loaded onto 7.5-20% (wt/wt) sucrose  
779 gradients in TN buffer + 2 mM EDTA and 0.1% NP-40, and centrifuged at 41,000 rpm  
780 (Beckman Coulter SW41 rotor) for 2 h at 4°C. 1 mL fractions were collected and aliquots



781 were analyzed by SDS-PAGE followed by western blot using an anti-Cp antibody to  
782 identify the NC fractions. The NC fractions were pooled, denatured with 0.5% SDS,  
783 retrieved with SA-DB, and processed as described under *Total cellular Cp population*.

#### 784 **cDNA library construction and sequencing**

785 The extracted RNA was ligated to the 3' adenylated adapter using Rnl2(1-249)K227Q  
786 ligase at 4°C overnight. A size marker mix containing synthetic 19 and 35 nt long RNAs  
787 was used as a positive control for all ligation steps. After ligation, the reaction was  
788 denatured at 90°C for 1 min and electrophoresed on a 15% denaturing Urea-PAGE.  
789 The gel was then exposed to a phosphoimager screen for an hour at -20°C. The image  
790 was printed to its original size and aligned on to the gel where the successfully ligated  
791 product was excised, shredded, and incubated with 0.3 M NaCl at 60°C for 45 minutes.  
792 The sample was filtered and then the RNA was precipitated in ethanol at -20°C for at  
793 least an hour. The precipitated RNA was pelleted and dissolved in water. The 5' adapter  
794 was ligated to the sample using Rnl1 for 1 h at 37°C. The sample was then processed  
795 the same way as the 3' adapter ligation reaction. The ligated sample was reverse  
796 transcribed to make cDNA using Superscript III reverse transcriptase for 2 h at 50°C. A  
797 pilot PCR was performed to optimize PCR cycle number to prevent over amplification of  
798 the library. This entailed taking a 10 uL aliquot from the pilot PCR after every three  
799 cycles between cycles 12 and 30 for agarose gel analysis. The lowest PCR cycle  
800 number to generate a visible PCR product by ethidium-bromide staining was used for  
801 the final PCR. The final PCR product was purified away from linker-linker (3' adapters  
802 ligated to 5' adapters) byproducts using a 3% Pippin Prep (Sage Science) before  
803 sequencing on an Illumina MiSeq machine. Oligonucleotides used (5' to 3'):

804 RNA PCR Index Primer 9

805 CAAGCAGAAGACGGCATAACGAGATCTGATCGTGACTGGAGTTCCTTGGCACCCGA

806 GAATTCCA;

807 RNA PCR Index Primer 10

808 CAAGCAGAAGACGGCATAACGAGATAAGCTAGTGACTGGAGTTCCTTGGCACCCGA

809 GAATTCCA;

810 RT Primer GCCTTGGCACCCGAGAATTCCA;

811 3' Barcode adapter 29.31 5'-rAppNNTAGCGATGGAATTCTCGGGTGCCAAGG-L;

812 3' Barcode adapter 29.32 5'-rAppNNCTGTAGTGGAATTCTCGGGTGCCAAGG-L;

813 3' Barcode adapter 29.33 5'-rAppNNTAGTCGTGGAATTCTCGGGTGCCAAGG-L;

814 L = aminolinker, 3'-amino modifier C7.

### 815 **RT-qPCR**

816 To quantify viral RNA in infected cells, Vero cells were mock infected or infected with

817 SFV WT or 17-site mutant at an MOI=0.01 for 1.5 h at 37°C. At the indicated time

818 points, cell-associated RNA was extracted using Trizol as per the manufacturer's

819 instructions. Total RNA was quantified by Nanodrop and RNA integrity was assessed by

820 2% (v/v) bleach agarose gel electrophoresis<sup>70</sup> to visualize rRNA. To quantify viral RNA

821 in released particles, Vero cells in two 10 cm plates were infected as above. At the

822 indicated time points, virus-containing media were collected and clarified by

823 centrifugation. An aliquot was taken from the clarified supernatant for titering via plaque

824 assay to determine infectious particle number. The remaining supernatant was layered

825 over a 20% sucrose cushion and pelleted as previously described (c.f. Methods,

826 Specific Infectivity). Pellets were resuspended in 100 µL of 50 mM Tris pH 7.4, 100 mM

827 NaCl, 1 mM EDTA, protease inhibitor (Roche; 1 tablet/10 mL), 1 U/uL recombinant  
828 Rnasin (RNase inhibitor) before extracting viral RNA using the MagMax viral RNA  
829 isolation kit as per the manufacturer's instructions. IVT gRNA was produced from SFV  
830 infectious clone plasmid and treated with 10 U of DNase1 (RNase-Free; NEB) for 30  
831 min at 37°C before purification with the RNeasy MiniElute Cleanup kit (Qiagen) as per  
832 the manufacturer's instructions. IVT gRNA integrity and purity was assessed by agarose  
833 gel analysis and quantified by NanoDrop. cDNA was synthesized from 5 ng of extracted  
834 cell-associated RNA, 5 ng of IVT gRNA, or 10% of pelleted viral RNA using the Verso  
835 cDNA synthesis kit and gRNA-specific or [gRNA+sgRNA] reverse primers. qPCR was  
836 performed using Power SYBR Green PCR Master Mix (Applied Biosystems) in a ViiA 7  
837 Real-Time PCR machine using 384-well plates. cDNA from samples corresponding to  
838 three biological replicates were assayed with technical duplicates. A no template control  
839 and mock-infected controls were used to ensure viral RNA-specific amplification. Four  
840 standard curves consisting of a 10-fold dilution series of IVT gRNA cDNA were used to  
841 calculate sample gRNA and [gRNA+sgRNA] copy numbers by relating the threshold  
842 cycle values. Cycle conditions were 50°C 2 min, 95°C 10 min, and 45 cycles of 95°C 15  
843 s and 60°C 1 min, followed by melt curve analysis. Oligonucleotides used (5' to 3'):  
844 gRNA-specific forward primer CTACGCTACACCAGATGAATACC, gRNA-specific  
845 reverse primer GGCTATGTCTGCTCTCTTAACTC, [gRNA+sgRNA] forward primer  
846 GCCTCGAACCAACCCTTAAT, and [gRNA+sgRNA] reverse primer  
847 CTTCTCTTTAGTGGAGCACTCTG.

#### 848 **Recombinant Cp expression and purification**

849 SFV Cp was cloned via PCR into pET29a with an N-terminal double Strep Tag  
850 (WSHPQFEK) followed by a glycine+serine linker and a TEV protease cleavage site  
851 (2XStrep\_GS\_TevClvg\_Cp) for expression in Rosetta2 cells. Rosetta2 cells were  
852 grown at 30°C until an OD<sub>600</sub> of 1.0, and protein expression was induced with IPTG at  
853 16°C overnight. Cells were harvested and resuspended in binding buffer (100 mM Tris-  
854 Cl pH 8.0, 150 mM NaCl, 1 mM EDTA, complete protease inhibitor cocktail (Roche; 1  
855 tablet/10 mL) before sonicating on ice. The lysate was clarified by two centrifugation  
856 steps. The soluble lysate was then diluted to 10X the volume in binding buffer  
857 supplemented with 1.5 M NaCl, mixed, and placed on ice overnight. The next day, the  
858 protein was purified via affinity chromatography using Strep-Tactin sepharose (IBA) and  
859 then dialyzed into 50 mM Tris-Cl pH 7.4 and 100 mM NaCl before concentrating and  
860 freezing. Protein purity (>99%) was assessed by SDS-PAGE and Coomassie staining  
861 (Fig. S5a). The sample's A<sub>260</sub>/A<sub>280</sub> ratio showed no RNA or DNA contamination.

#### 862 ***In vitro* core-like particle (CLP) assembly**

863 HPLC purified RNA oligos corresponding to site #1 or its mutant version were  
864 purchased from IDT. RNAs were denatured at 90°C for 2 min and chilled on ice for 10  
865 min before serially diluting to 10 µM in 50 mM K-HEPES pH 7.0, 200 mM KCl, 10 mM  
866 MgCl<sub>2</sub>. Diluted RNAs were incubated at 37°C for 30 min to promote folding before  
867 placing back on ice. CLPs were assembled in a 100 µL volume in reaction buffer [50  
868 mM Tris pH 7.0, 150 mM NaCl, 5 mM MgCl<sub>2</sub>, 5 mM KCl, 0.01% (v/v) Tween 20, 1 µg/µL  
869 BSA, 5 mM DTT, and 0.8 U/µL of recombinant RNasin (RNase inhibitor)]. Cp was  
870 diluted (500 nM final concentration) in reaction buffer before adding 10mer DNA oligo  
871 (CCGTTAATGC; 10 µM final concentration) or buffer control (50 mM Tris pH 7.4, 100

872 mM NaCl) for 10 min at RT. Reactions were placed on ice and then each RNA oligo  
873 (500 nM final concentration) or buffer control was added. CLP assembly reactions were  
874 incubated at 25°C for 30 min before loading onto 15-30% (wt/wt) sucrose gradients and  
875 spinning at 159,599 X g for 43 min at 4°C (Beckman Coulter TLS 55 rotor). Gradients  
876 were immediately fractionated and aliquots of each fraction were denatured by boiling in  
877 1% SDS to ensure antibody access, and then diluted into binding buffer (50 mM Tris pH  
878 8.0, 150 mM NaCl, 2 mM EDTA, and 1% NP-40) to make a mixed detergent micelle  
879 (~0.075% SDS final concentration). A corresponding standard curve consisting of a 2-  
880 fold dilution series of purified Cp was similarly processed to mimic sucrose, SDS, and  
881 boiling conditions (Fig. S5b) for every CLP experiment. Samples were bound in  
882 duplicate or triplicate to high-capacity streptavidin-coated plates (Pierce) preblocked  
883 with 1% BSA in TBS (25 mM Tris pH 7.2, 150 mM NaCl) for ~12-18 h at 4°C. Plates  
884 were incubated with a polyclonal antibody to Cp followed by secondary antibody  
885 conjugated to alkaline phosphatase. pNPP substrate was added for 15 min before  
886 measuring absorbance at 405 nm on a Tecan Infinite F50 plate reader.

### 887 ***In vitro* binding assay**

888 *In vitro* binding assays were performed following the RNA Bind-n-Seq protocol<sup>71</sup> with  
889 the following modifications. Recombinant Cp was immobilized on Strep-TactinXT coated  
890 magnetic beads (20 pmole protein/μl bead slurry) in buffer w (100 mM Tris-Cl pH 8.0,  
891 150 mM NaCl, 1 mM EDTA). Beads were resuspended in RNA binding buffer (25 mM  
892 Tris pH 7.5, 150 mM KCl, 3 mM MgCl<sub>2</sub>, 0.01% (v/v) Tween 20, 1 mg/mL BSA, 1 mM  
893 DTT). Binding reactions were prepared in 96 well plates. A total of 13.3 pmole of Cp  
894 was immobilized on beads per 30 μl reaction and concentrations of 333 nM site #1 or its

895 mutant along with increasing concentrations of random 29 mer RNA (4-1000 nM) were  
896 added in each well with or without 20 µg/ml poly(I:C) preincubation. Binding was  
897 performed for 30 minutes at 30°C and the plate was then placed on a 96 well magnetic  
898 rack. The beads were washed 3 times with wash buffer (25 mM Tris pH 7.5, 150 mM  
899 KCl, 60 ug/mL BSA, 0.5 mM EDTA, 0.01% (v/v) Tween 20). 40 µl of elution buffer  
900 (10mM Tris pH 7.0, 1mM EDTA, 1% SDS) was added to the beads before heating at  
901 70° C for 10 minutes. The supernatant from each well was placed in a new plate and  
902 the bound RNA was purified away from Cp by phenol/chloroform isolation. The purified  
903 RNA was resolved by 15% denaturing Urea-PAGE.

#### 904 **PAR-CLIP data analysis**

905 Adapters were removed using Cutadapt<sup>72</sup> and the remaining sequences were mapped  
906 to the SFV4 genome using Bowtie. Only mapped sequences that contained the  
907 characteristic T-to-C mutation were further used. Initial analyses compared sequence  
908 reads (uncollapsed reads) vs. unique reads stemming from the barcoded adapters  
909 (collapsed reads) to assess PCR duplicates. No significant difference was observed in  
910 Cp's top binding sites between the uncollapsed vs. collapsed reads, which was  
911 expected because we carefully optimized PCR cycle number during cDNA library  
912 construction (as described above). We therefore continued our analyses with the  
913 uncollapsed reads. Reads were normalized to the nucleotide position with the highest  
914 read frequency within the library, and then biological replicates were averaged and  
915 renormalized to produce the final normalized read density. High confidence binding  
916 sites were manually defined with the following criteria: the binding site must be at least  
917 10 nt long, have at least one position containing an average normalized read density

918  $\geq 5.0$ , and both replicate libraries must have  $\geq 250$  reads at that position. Within these  
919 binding sites, the 5' and 3' ends were generally defined by having  $\geq 1.5$  average  
920 normalized read density,  $\geq 10$  reads per replicate library, and 3' G-bias due to RNaseT1  
921 digest. Low confidence binding sites were defined as those with at least an average  
922 normalized read density  $\geq 1.0$  and  $\geq 10$  reads for each replicate library.

### 923 **Statistical analysis**

924 Statistical analyses were performed using GraphPad Prism 7.04 (GraphPad Software).  
925 The specific statistical tests used and the number of replicates per experiment are  
926 stated in the figure legends. In all graphs, four asterisks indicate a P-value of  $< 0.0001$ ,  
927 three asterisks indicate  $< 0.001$ , two asterisks indicate  $< 0.01$ , one asterisk indicates  
928  $< 0.05$ , and ns indicates  $> 0.05$ .

929

### 930 **DATA AVAILABILITY**

931 Upon publication, the datasets generated during and/or analyzed during the current  
932 study will be made available in the NCBI GEO repository.

933 **REFERENCES**

934

- 935 1. Kuhn, R. J. in *Fields Virology* Vol. 1 (eds D.M. Knipe & P.M. Howley) Ch. 22,  
936 629-650 (Lippincott, Williams and Wilkins, 2013).
- 937 2. Weaver, S. C., Winegar, R., Manger, I. D. & Forrester, N. L. Alphaviruses:  
938 population genetics and determinants of emergence. *Antiviral Res* **94**, 242-257  
939 (2012).
- 940 3. Suhrbier, A., Jaffar-Bandjee, M. C. & Gasque, P. Arthritogenic alphaviruses--an  
941 overview. *Nat. Rev. Rheumatol.* **8**, 420-429 (2012).
- 942 4. Levi, L. I. & Vignuzzi, M. Arthritogenic Alphaviruses: A Worldwide Emerging  
943 Threat? *Microorganisms* **7** (2019).
- 944 5. Claflin, S. B. & Webb, C. E. Ross River Virus: Many Vectors and Unusual Hosts  
945 Make for an Unpredictable Pathogen. *PLoS Pathog.* **11**, e1005070-e1005070  
946 (2015).
- 947 6. Wengler, G., Wengler, G., Boege, U. & Wahn, K. Establishment and analysis of a  
948 system which allows assembly and disassembly of alphavirus core-like particles  
949 under physiological conditions in vitro. *Virology* **132**, 401-412 (1984).
- 950 7. Pietila, M. K., Hellstrom, K. & Ahola, T. Alphavirus polymerase and RNA  
951 replication. *Virus Res.* **234**, 44-57 (2017).
- 952 8. Brown, R. S., Wan, J. J. & Kielian, M. The Alphavirus Exit Pathway: What We  
953 Know and What We Wish We Knew. *Viruses* **10** (2018).
- 954 9. Rumenapf, T., Strauss, E. G. & Strauss, J. H. Subgenomic mRNA of Aura  
955 alphavirus is packaged into virions. *J. Virol.* **68**, 56-62 (1994).



- 956 10. Owen, K. E. & Kuhn, R. J. Identification of a region in the sindbis virus  
957 nucleocapsid protein that is involved in specificity of RNA encapsidation. *J. Virol.*  
958 **70**, 2757-2763 (1996).
- 959 11. Warriar, R., Linger, B. R., Golden, B. L. & Kuhn, R. J. Role of sindbis virus capsid  
960 protein region II in nucleocapsid core assembly and encapsidation of genomic  
961 RNA. *J. Virol.* **82**, 4461-4470 (2008).
- 962 12. Sokoloski, K. J. *et al.* Identification of Interactions between Sindbis Virus Capsid  
963 Protein and Cytoplasmic vRNA as Novel Virulence Determinants. *PLoS Pathog.*  
964 **13**, e1006473 (2017).
- 965 13. Garmashova, N., Gorchakov, R., Frolova, E. & Frolov, I. Sindbis virus  
966 nonstructural protein nsP2 is cytotoxic and inhibits cellular transcription. *J. Virol.*  
967 **80**, 5686-5696 (2006).
- 968 14. Akhrymuk, I., Kulemzin, S. V. & Frolova, E. I. Evasion of the innate immune  
969 response: the Old World alphavirus nsP2 protein induces rapid degradation of  
970 Rpb1, a catalytic subunit of RNA polymerase II. *J. Virol.* **86**, 7180-7191 (2012).
- 971 15. Mendes, A. & Kuhn, R. J. Alphavirus Nucleocapsid Packaging and Assembly.  
972 *Viruses* **10** (2018).
- 973 16. Levis, R., Weiss, B. G., Tsiang, M., Huang, H. & Schlesinger, S. Deletion  
974 mapping of Sindbis virus DI RNAs derived from cDNAs defines the sequences  
975 essential for replication and packaging. *Cell* **44**, 137-145 (1986).
- 976 17. Kim, D. Y., Firth, A. E., Atasheva, S., Frolova, E. I. & Frolov, I. Conservation of a  
977 packaging signal and the viral genome RNA packaging mechanism in alphavirus  
978 evolution. *J. Virol.* **85**, 8022-8036 (2011).

- 979 18. Frolova, E., Frolov, I. & Schlesinger, S. Packaging signals in alphaviruses. *J.*  
980 *Virolog.* **71**, 248-258 (1997).
- 981 19. White, C. L., Thomson, M. & Dimmock, N. J. Deletion analysis of a defective  
982 interfering Semliki Forest virus RNA genome defines a region in the nsP2  
983 sequence that is required for efficient packaging of the genome into virus  
984 particles. *J. Virol.* **72**, 4320-4326 (1998).
- 985 20. Tellinghuisen, T. L., Hamburger, A. E., Fisher, B. R., Ostendorp, R. & Kuhn, R. J.  
986 In vitro assembly of alphavirus cores by using nucleocapsid protein expressed in  
987 *Escherichia coli*. *J. Virol.* **73**, 5309-5319 (1999).
- 988 21. Tellinghuisen, T. L. & Kuhn, R. J. Nucleic acid-dependent cross-linking of the  
989 nucleocapsid protein of Sindbis virus. *J. Virol.* **74**, 4302-4309 (2000).
- 990 22. Mukhopadhyay, S., Chipman, P. R., Hong, E. M., Kuhn, R. J. & Rossmann, M. G.  
991 In vitro-assembled alphavirus core-like particles maintain a structure similar to  
992 that of nucleocapsid cores in mature virus. *J. Virol.* **76**, 11128-11132 (2002).
- 993 23. Wengler, G., Boege, U., Wengler, G., Bischoff, H. & Wahn, K. The core protein of  
994 the alphavirus Sindbis virus assembles into core-like nucleoproteins with the viral  
995 genome RNA and with other single-stranded nucleic acids in vitro. *Virolog.* **118**,  
996 401-410 (1982).
- 997 24. Cheng, F. *et al.* The packaging of different cargo into enveloped viral  
998 nanoparticles. *Molecular pharmaceutics* **10**, 51-58 (2013).
- 999 25. Hafner, M. *et al.* Transcriptome-wide identification of RNA-binding protein and  
1000 microRNA target sites by PAR-CLIP. *Cell* **141**, 129-141 (2010).

- 1001 26. Zheng, Y. & Kielian, M. Imaging of the Alphavirus Capsid Protein during Virus  
1002 Replication. *J. Virol.* **87**, 9579-9589 (2013).
- 1003 27. Howarth, M. *et al.* A monovalent streptavidin with a single femtomolar biotin  
1004 binding site. *Nat Methods* **3**, 267-273 (2006).
- 1005 28. Howarth, M. & Ting, A. Y. Imaging proteins in live mammalian cells with biotin  
1006 ligase and monovalent streptavidin. *Nat Protoc* **3**, 534-545 (2008).
- 1007 29. Schatz, P. J. Use of peptide libraries to map the substrate specificity of a peptide-  
1008 modifying enzyme: a 13 residue consensus peptide specifies biotinylation in  
1009 *Escherichia coli*. *Biotechnology (N Y)* **11**, 1138-1143 (1993).
- 1010 30. Beckett, D., Kovaleva, E. & Schatz, P. J. A minimal peptide substrate in biotin  
1011 holoenzyme synthetase-catalyzed biotinylation. *Protein Sci* **8**, 921-929 (1999).
- 1012 31. Beitzel, B. F., Bakken, R. R., Smith, J. M. & Schmaljohn, C. S. High-resolution  
1013 functional mapping of the venezuelan equine encephalitis virus genome by  
1014 insertional mutagenesis and massively parallel sequencing. *PLoS Pathog.* **6**,  
1015 e1001146 (2010).
- 1016 32. Kutluay, S. B. *et al.* Global changes in the RNA binding specificity of HIV-1 gag  
1017 regulate virion genesis. *Cell* **159**, 1096-1109 (2014).
- 1018 33. Benhalevy, D. *et al.* The Human CCHC-type Zinc Finger Nucleic Acid-Binding  
1019 Protein Binds G-Rich Elements in Target mRNA Coding Sequences and  
1020 Promotes Translation. *Cell Rep.* **18**, 2979-2990 (2017).
- 1021 34. Sauer, M. *et al.* DHX36 prevents the accumulation of translationally inactive  
1022 mRNAs with G4-structures in untranslated regions. *Nat Commun* **10**, 2421  
1023 (2019).

- 1024 35. Frith, M. C., Saunders, N. F., Kobe, B. & Bailey, T. L. Discovering sequence  
1025 motifs with arbitrary insertions and deletions. *PLoS computational biology* **4**,  
1026 e1000071 (2008).
- 1027 36. Zuker, M. Mfold web server for nucleic acid folding and hybridization prediction.  
1028 *Nucleic Acids Res* **31**, 3406-3415 (2003).
- 1029 37. Twarock, R., Bingham, R. J., Dykeman, E. C. & Stockley, P. G. A modelling  
1030 paradigm for RNA virus assembly. *Curr Opin Virol* **31**, 74-81 (2018).
- 1031 38. Dykeman, E. C., Stockley, P. G. & Twarock, R. Solving a Levinthal's paradox for  
1032 virus assembly identifies a unique antiviral strategy. *Proc.Natl.Acad.Sci.USA* **111**,  
1033 5361-5366 (2014).
- 1034 39. Rayaprolu, V. *et al.* Length of encapsidated cargo impacts stability and structure  
1035 of in vitro assembled alphavirus core-like particles. *Journal of physics.*  
1036 *Condensed matter : an Institute of Physics journal* **29**, 484003 (2017).
- 1037 40. Jalanko, A. & Soderlund, H. The repeated regions of Semliki Forest virus  
1038 defective-interfering RNA interferes with the encapsidation process of the  
1039 standard virus. *Viol.* **141**, 257-266 (1985).
- 1040 41. Weiss, B., Nitschko, H., Ghattas, I., Wright, R. & Schlesinger, S. Evidence for  
1041 specificity in the encapsidation of Sindbis virus RNAs. *J. Virol.* **63**, 5310-5318  
1042 (1989).
- 1043 42. Vignuzzi, M. & Lopez, C. B. Defective viral genomes are key drivers of the virus-  
1044 host interaction. *Nat. Micro.* **4**, 1075-1087 (2019).
- 1045 43. Ulmanen, I. Assembly of Semliki Forest virus nucleocapsid: detection of a  
1046 precursor in infected cells. *J.Gen.Virol.* **41**, 353-365 (1978).

- 1047 44. Forsell, K., Griffiths, G. & Garoff, H. Preformed cytoplasmic nucleocapsids are  
1048 not necessary for alphavirus budding. *EMBO J.* **15**, 6495-6505 (1996).
- 1049 45. Skoging-Nyberg, U. & Liljestrom, P. M-X-I motif of semliki forest virus capsid  
1050 protein affects nucleocapsid assembly. *J. Virol.* **75**, 4625-4632 (2001).
- 1051 46. Borodavka, A., Tuma, R. & Stockley, P. G. Evidence that viral RNAs have  
1052 evolved for efficient, two-stage packaging. *Proc.Natl.Acad.Sci.USA* **109**, 15769-  
1053 15774 (2012).
- 1054 47. Soderlund, H. Kinetics of formation of the Semliki Forest virus nucleocapsid.  
1055 *Interviol.* **1**, 354-361 (1973).
- 1056 48. Dolan, P. T., Whitfield, Z. J. & Andino, R. Mechanisms and Concepts in RNA  
1057 Virus Population Dynamics and Evolution. *Annu Rev Virol* **5**, 69-92 (2018).
- 1058 49. Pfeiffer, J. K. & Kirkegaard, K. Increased fidelity reduces poliovirus fitness and  
1059 virulence under selective pressure in mice. *PLoS Pathog.* **1**, e11 (2005).
- 1060 50. D'Souza, V. & Summers, M. F. How retroviruses select their genomes. *Nat. Rev.*  
1061 *Micro.* **3**, 643-655 (2005).
- 1062 51. Laham-Karam, N. & Bacharach, E. Transduction of human immunodeficiency  
1063 virus type 1 vectors lacking encapsidation and dimerization signals. *J. Virol.* **81**,  
1064 10687-10698 (2007).
- 1065 52. Shakeel, S. *et al.* Genomic RNA folding mediates assembly of human  
1066 parechovirus. *Nat Commun* **8**, 5 (2017).
- 1067 53. Patel, N. *et al.* HBV RNA pre-genome encodes specific motifs that mediate  
1068 interactions with the viral core protein that promote nucleocapsid assembly. *Nat.*  
1069 *Micro.* **2**, 17098 (2017).

- 1070 54. Twarock, R. & Stockley, P. G. RNA-Mediated Virus Assembly: Mechanisms and  
1071 Consequences for Viral Evolution and Therapy. *Annual Review of Biophysics* **48**,  
1072 495-514 (2019).
- 1073 55. Zheng, Y. & Kielian, M. An alphavirus temperature-sensitive capsid mutant  
1074 reveals stages of nucleocapsid assembly. *Viol.* **484**, 412-420 (2015).
- 1075 56. Lamb, K., Lokesh, G. L., Sherman, M. & Watowich, S. Structure of a Venezuelan  
1076 equine encephalitis virus assembly intermediate isolated from infected cells.  
1077 *Viol.* **406**, 261-269 (2010).
- 1078 57. Paredes, A., Alwell-Warda, K., Weaver, S. C., Chiu, W. & Watowich, S. J.  
1079 Structure of isolated nucleocapsids from venezuelan equine encephalitis virus  
1080 and implications for assembly and disassembly of enveloped virus. *J. Virol.* **77**,  
1081 659-664 (2003).
- 1082 58. Yap, M. L. *et al.* Structural studies of Chikungunya virus maturation.  
1083 *Proc.Natl.Acad.Sci.USA* (2017).
- 1084 59. Hasan, S. S. *et al.* Cryo-EM Structures of Eastern Equine Encephalitis Virus  
1085 Reveal Mechanisms of Virus Disassembly and Antibody Neutralization. *Cell Rep.*  
1086 **25**, 3136-3147.e3135 (2018).
- 1087 60. Ahn, A., Klimjack, M. R., Chatterjee, P. K. & Kielian, M. An epitope of the Semliki  
1088 Forest virus fusion protein exposed during virus-membrane fusion. *J. Virol.* **73**,  
1089 10029-10039 (1999).
- 1090 61. Greiser-Wilke, I., Moennig, V., Kaaden, O.-R. & Figueiredo, L. T. M. Most  
1091 alphaviruses share a conserved epitopic region on their nucleocapsid protein.  
1092 *J.Gen.Virol.* **70**, 743-748 (1989).

- 1093 62. Kielian, M., Jungerwirth, S., Sayad, K. U. & DeCandido, S. Biosynthesis,  
1094 maturation, and acid-activation of the Semliki Forest virus fusion protein. *J. Virol.*  
1095 **64**, 4614-4624 (1990).
- 1096 63. Liljeström, P., Lusa, S., Huylebroeck, D. & Garoff, H. In vitro mutagenesis of a  
1097 full-length cDNA clone of Semliki Forest virus: the small 6,000-molecular-weight  
1098 membrane protein modulates virus release. *J. Virol.* **65**, 4107-4113 (1991).
- 1099 64. Ashbrook, A. W. *et al.* Residue 82 of the Chikungunya virus E2 attachment  
1100 protein modulates viral dissemination and arthritis in mice. *J. Virol.* **88**, 12180-  
1101 12192 (2014).
- 1102 65. Mechold, U., Gilbert, C. & Ogryzko, V. Codon optimization of the BirA enzyme  
1103 gene leads to higher expression and an improved efficiency of biotinylation of  
1104 target proteins in mammalian cells. *J Biotechnol* **116**, 245-249 (2005).
- 1105 66. Yamaji, M. *et al.* DND1 maintains germline stem cells via recruitment of the  
1106 CCR4-NOT complex to target mRNAs. *Nature* **543**, 568-572 (2017).
- 1107 67. Benhalevy, D., McFarland, H. L., Sarshad, A. A. & Hafner, M. PAR-CLIP and  
1108 streamlined small RNA cDNA library preparation protocol for the identification of  
1109 RNA binding protein target sites. *Methods* **118-119**, 41-49 (2017).
- 1110 68. Danan, C., Manickavel, S. & Hafner, M. PAR-CLIP: A Method for Transcriptome-  
1111 Wide Identification of RNA Binding Protein Interaction Sites. *Methods in*  
1112 *molecular biology (Clifton, N.J.)* **1358**, 153-173 (2016).
- 1113 69. Hafner, M. *et al.* PAR-CLIP--a method to identify transcriptome-wide the binding  
1114 sites of RNA binding proteins. *J. Vis. Exp.* (2010).

- 1115 70. Aranda, P. S., LaJoie, D. M. & Jorcyk, C. L. Bleach gel: a simple agarose gel for  
1116 analyzing RNA quality. *Electrophoresis* **33**, 366-369 (2012).
- 1117 71. Lambert, N. *et al.* RNA Bind-n-Seq: quantitative assessment of the sequence and  
1118 structural binding specificity of RNA binding proteins. *Mol.Cell* **54**, 887-900  
1119 (2014).
- 1120 72. Martin, M. Cutadapt removes adapter sequences from high-throughput  
1121 sequencing reads. *EMBnet.journal* **17**, 10-12 (2011).
- 1122
